1 Somatic inactivating *PTPRJ* mutations and dysregulated pathways identified in canine melanoma by  
2 integrated comparative genomic analysis

3  
4 Hendricks W<sup>1\*</sup>, Zismann V<sup>1\*</sup>, Sivaprakasam K<sup>1,2\*</sup>, Legendre C<sup>1</sup>, Poorman K<sup>3,4</sup>, Tembe W<sup>1</sup>, Kiefer J<sup>1</sup>, Liang  
5 W<sup>1</sup>, DeLuca V<sup>1,5</sup>, Stark M<sup>6</sup>, Ruhe A<sup>7</sup>, Froman R<sup>8</sup>, Duesbury N<sup>9</sup>, Washington M<sup>1</sup>, Jessica Aldrich<sup>1</sup>, Neff M<sup>10</sup>,  
6 Huentelman M<sup>11</sup>, Hayward N<sup>12</sup>, Brown K<sup>13</sup>, Thamm D<sup>14</sup>, Post G<sup>15</sup>, Khanna C<sup>1</sup>, Davis B<sup>16</sup>, Breen M<sup>3,17</sup>,  
7 Sekulic A<sup>1,4</sup>, Trent J<sup>1</sup>

8  
9 <sup>1</sup> Integrated Cancer Genomics Division, Translational Genomics Research Institute (TGen), Phoenix,  
10 Arizona, United States of America

11 <sup>2</sup> Department of Biomedical Informatics, Arizona State University, Phoenix, Arizona, United States of  
12 America

13 <sup>3</sup>Department of Molecular Biomedical Sciences, College of Veterinary Medicine, North Carolina State  
14 University, Raleigh, NC, United States of America

15 <sup>4</sup> Department of Dermatology, Mayo Clinic, Scottsdale, AZ, USA

16 <sup>5</sup> School of Life Sciences, Arizona State University, Phoenix, Arizona, United States of America

17 <sup>6</sup> Dermatology Research Centre, The University of Queensland, The University of Queensland  
18 Diamantina Institute, Translational Research Institute, Brisbane, Queensland, Australia

19 <sup>7</sup> Veterinary Genetics Laboratory, University of California Davis, Davis, California, United States of  
20 America

21 <sup>8</sup> Laboratory of Cancer and Developmental Cell Biology, Van Andel Research Institute, Grand Rapids,  
22 Michigan, United States of America

23 <sup>9</sup> Spectrum Health, Grand Rapids, Michigan, United States of America

24 <sup>10</sup> Program in Canine Genetics and Genomics, Van Andel Research Institute, Grand Rapids, Michigan,  
25 United States of America

26 <sup>11</sup> Neurogenomics Division, Translational Genomics Research Institute (TGen), Phoenix, Arizona, United  
27 States of America

28 <sup>12</sup> Oncogenomics Laboratory, QIMR Berghofer Medical Research Institute, Herston, Brisbane,  
29 Queensland, Australia

30 <sup>13</sup> Division of Cancer Epidemiology and Genetics, National Cancer Institute, National Institutes of Health,  
31 Gaithersburg, Maryland, United States of America

32 <sup>14</sup> College of Veterinary Medicine and Biomedical Sciences, Colorado State University Flint Animal Cancer  
33 Center, Fort Collins, Colorado, United States of America

34 <sup>15</sup> The Veterinary Cancer Center, Norwalk, Connecticut, United States of America

35 <sup>16</sup> Innogenics Inc., Harvard, Massachusetts, United States of America

36 <sup>17</sup> Comparative Medicine Institute, North Carolina State University, Raleigh, NC, United States of America

37

38 \*These authors contributed equally to this work

39

40 Corresponding author:

41 Jeffrey M. Trent

42 445 N 5<sup>th</sup> St.

43 Phoenix, AZ 85004

44 Phone: (602) 343-8419

45 Fax: (602) 343-8448

46 Email: jtrent@tgen.org

## 47 **ABSTRACT**

48 Canine malignant melanoma, a significant cause of mortality in domestic dogs, is a powerful  
49 comparative model for human melanoma, but little is known about its genetic etiology. We mapped the  
50 genomic landscape of canine melanoma through multi-platform analysis of 37 tumors (31 mucosal, 3  
51 acral, 2 cutaneous, and 1 uveal) and 17 matching constitutional samples including long- and short-insert  
52 whole genome sequencing, RNA sequencing, array comparative genomic hybridization, single nucleotide  
53 polymorphism array, and targeted Sanger sequencing analyses. We identified novel predominantly  
54 truncating mutations in the putative tumor suppressor gene *PTPRJ* in 19% of cases. No *BRAF* mutations  
55 were detected, but activating *RAS* mutations (24% of cases) occurred in conserved hotspots in all  
56 cutaneous and acral and 13% of mucosal subtypes. *MDM2* amplifications (24%) and *TP53* mutations  
57 (19%) were mutually exclusive. Additional low-frequency recurrent alterations were observed amidst  
58 low point mutation rates, an absence of ultraviolet light mutational signatures, and an abundance of  
59 copy number and structural alterations. Mutations that modulate cell proliferation and cell cycle control  
60 were common and highlight therapeutic axes such as MEK and MDM2 inhibition. This mutational  
61 landscape resembles that seen in *BRAF* wild-type and sun-shielded human melanoma subtypes. Overall,  
62 these data inform biological comparisons between canine and human melanoma while suggesting  
63 actionable targets in both species.

64

## 65 **AUTHOR SUMMARY**

66 Melanoma, an aggressive cancer arising from transformed melanocytes, commonly occurs in pet  
67 dogs. Unlike human melanoma, which most often occurs in sun-exposed cutaneous skin, canine  
68 melanoma typically arises in sun-shielded oral mucosa. Clinical features of canine melanoma resemble  
69 those of human melanoma, particularly the less common sun-shielded human subtypes. However,  
70 whereas the genomic basis of diverse human melanoma subtypes is well understood, canine melanoma  
71 genomics remain poorly defined. Similarly, although diverse new treatments for human melanoma  
72 based on a biologic disease understanding have recently shown dramatic improvements in outcomes for  
73 these patients, treatments for canine melanoma are limited and outcomes remain universally poor.  
74 Detailing the genomic basis of canine melanoma thus provides untapped potential for improving the  
75 lives of pet dogs while also helping to establish canine melanoma as a comparative model system for  
76 informing human melanoma biology and treatment. In order to better define the genomic landscape of  
77 canine melanoma, we performed multi-platform characterization of 37 tumors. Our integrated analysis  
78 confirms that these tumors commonly contain mutations in canine orthologs of human cancer genes  
79 such as *RAS*, *MDM2*, and *TP53* as well mutational patterns that share important similarities with human  
80 melanoma subtypes. We have also found a new putative cancer gene, *PTPRJ*, frequently mutated in  
81 canine melanoma. These data will guide additional biologic and therapeutic studies in canine melanoma  
82 while framing the utility of comparative studies of canine and human cancers more broadly.

83

## 84 **INTRODUCTION**

85 Human melanoma is of increasing clinical concern. It is one of a few cancers with rising  
86 incidence, while five-year survival for patients with metastatic disease has until recently remained low  
87 (15-20%) due to a dearth of curative systemic therapies(1). Discovery of frequent activating *BRAF*  
88 mutations in melanoma and treatment with selective inhibitors of this mutant kinase has led to  
89 dramatic responses in the setting of metastatic disease(2-4). However, not all *BRAF*-mutant melanomas  
90 respond to targeted therapy and responses that do occur are often brief and followed by the emergence  
91 of drug-resistant disease(5). Moreover, targeted treatment options in melanoma subtypes without  
92 activating *BRAF* mutations are limited. New treatment paradigms such as immunotherapy, drug

93 combinations, and alternative dosing strategies may circumvent resistance and broaden the scope of  
94 precision medicine in melanoma(6-9), but rapid preclinical study of such regimens requires access to  
95 robust models that recapitulate complex tumor features such as intratumoral genomic heterogeneity  
96 and tumor-host interactions. Meanwhile, few animal models exist for uncommon molecular or  
97 histological melanoma subtypes such as *BRAF* wild-type (*BRAF*<sub>wt</sub>) or mucosal melanoma.

98 Naturally-occurring canine cancers are increasingly recognized as meeting a need for complex  
99 cancer models that develop gradually amidst interactions with host stroma and immune system(10-16).  
100 Spontaneous canine malignant melanomas, which are almost universally *BRAF*<sub>wt</sub> and for which the  
101 mucosal subtype is the most prevalent clinically significant form, may fill a specific gap in models of  
102 *BRAF*<sub>wt</sub> and rare histological melanoma subtypes(11). Human mucosal melanoma is an aggressive  
103 histological subtype that is predominantly *BRAF*, *RAS*, and *NF1* wild type (Triple Wild Type or TWT) with  
104 occasional mutations in *KIT* or *NRAS* and carries a five-year survival rate between 12.3% and 35.3% (17-  
105 26). Study of this subtype is limited by its low prevalence, only 1-2% of human melanomas in the United  
106 States, with as few as 1,500 cases per year(27). On the other hand, canine malignant melanoma  
107 accounts for up to 100,000 yearly cancer diagnoses in the United States, occurring most commonly in  
108 the oral mucosa, but also arising in cutaneous and acral epithelium(28-31).

109 Canine malignant melanoma is highly prevalent, closely mirrors human melanoma clinically and  
110 pathologically, and is extremely aggressive, with median survival for oral cases being a mere 200  
111 days(32-36). However, little is known about its genetic etiology. It is predominantly *BRAF*<sub>wt</sub> with  
112 frequent copy number alterations of regions of canine chromosomes (CFA) 13, 17, 22, and 30, alongside  
113 frequent *MYC* amplifications and deletions of *CDKN2A*. Targeted sequencing studies, though limited,  
114 have shown that it infrequently bears alterations in other known drivers of human melanoma(32, 36-  
115 42). It has been shown that CFA 30 aberrations are characteristic of canine oral melanoma and complex  
116 copy number profiles on this chromosome homologous to the same profiles on human chromosome  
117 (HSA) 15 in human mucosal melanoma are suggestive of rearrangements that may drive this melanoma  
118 subtype (41). Despite the very low prevalence of *BRAF* mutations, immunohistochemistry (IHC) has  
119 shown that the mitogen-activated protein kinase (MAPK) and/or phosphoinositide 3-kinase (PI3K)  
120 pathways are activated in 52-77% of cases(32, 36-40). These data hint at underlying mutations driving  
121 these pathways that could guide future biological exploration and therapeutic development in the  
122 canine and human diseases.

123 We therefore set out to map the genomic landscape of canine melanoma using a combination of  
124 massively parallel whole genome sequencing (WGS), array-based platforms and targeted sequencing to  
125 identify somatic changes driving these cancers. Here we report the identification of recurrent  
126 inactivating mutations in the candidate tumor suppressor gene *PTPRJ* in addition to frequent *RAS*  
127 mutations, and mutually-exclusive *MDM2* and *TP53* alterations. We thereby define the genomic  
128 landscape of these cancers and identify similarities between melanoma subtypes across species while  
129 highlighting subtype-specific aberrations that may be used to guide future research.

130

## 131 RESULTS

132 **Patterns of mutation identified by whole genome analysis of canine melanoma.** We undertook  
133 comprehensive analysis of acquired genetic alterations in a discovery cohort of seven melanomas and  
134 matched germlines from six dogs (two tumors were derived from one dog) using WGS for detection of  
135 subtle sequence alterations alongside long-insert WGS (LI-WGS, see Materials and Methods)(43) for  
136 sensitive detection of structural variants. We then performed copy number and targeted gene analyses  
137 in an additional 27 tumors and three melanoma cell lines (**Table 1**). Tumors (all primary tumors except  
138 one acral metastasis) and matching whole blood were collected through the Van Andel Research

139 Institute from dogs undergoing surgery at specialty veterinary clinics and immediately snap frozen.  
140 Diagnosis of melanoma was confirmed by two independent board certified veterinary pathologists in  
141 addition to staining for three melanocytic differentiation markers where tissue was available(36, 44).  
142 Diverse breeds are represented in this cohort with enrichment for Cocker Spaniels and Golden  
143 Retrievers (five dogs of each breed), an equal ratio of male and female dogs and a median age at  
144 resection of 11 years. Clinicopathologic characteristics for this cohort are described in **Supplementary**  
145 **Table 1** and **Supplementary Figure 1**.

146 For WGS and LI-WGS respectively a median of 38/11-fold sequence coverage and 209/155-fold  
147 physical coverage was achieved (**Supplementary Table 2**). Read alignment was performed using the  
148 canine reference genome CanFam 3.1 and stringent criteria were used to call somatic sequence variants  
149 intersecting Seurat, Strelka and Mutect (Materials and Methods). A total of 31,053 somatic single  
150 nucleotide variants (SNVs) and small insertions and deletions (indels) were found with a median of 4,223  
151 genome-wide SNVs (range 1,880-6,342) and 316 indels (range 88 - 655) and a median mutation rate of  
152 2.03 mutations per callable haploid megabase (range 0.97-3.14, **Table 2**). The genome-wide SNV  
153 spectrum showed C:G>T:A transitions to be most prevalent, at a median of 27.09% of total SNVs  
154 followed by T:A>C:G transitions (median of 21.19%) and C:G>A:T transversions (median 15.74% ,  
155 **Supplementary Figure 2A**). Despite the prevalence of C:G>T:A transitions, most occurred in CpG  
156 dinucleotides and were not enriched at dipyrimidines (median 22.5%). Therefore, a canonical UV  
157 signature was not present in any of these cases (**Supplementary Figure 2B**)(45, 46). We additionally  
158 looked for *TERT* promoter mutations, which have been reported in 71% of human cutaneous  
159 melanomas and are associated with UV damage(47), but no mutations were found within one kilobase  
160 of the *TERT* transcription start site. While no single mutation was represented at greater than 4% of the  
161 SNV population, C:G>T:A in GCG trinucleotides was the most common mutation (median 6.7%) followed  
162 by C>T in ACG (median 2.6%) and C>A in TCT (median 2.5%) (**Supplementary Figure 2C**). No evidence of  
163 localized hypermutation (kataegis) was identified in these tumors(48).

164  
165 **Somatic coding mutations identified in canine melanoma.** Tumors assessed by whole-genome analysis  
166 displayed an abundance of somatic SVs and copy number variants (CNVs), with a modest burden of SNVs  
167 in coding regions (**Figure 1A and 1B**). The landscape of somatic mutations in the full cohort of 37 tumors  
168 based on multi-platform analysis is shown in **Figure 1C**. Circos plots depicting somatic alterations in each  
169 tumor in the discovery cohort are shown in **Supplementary Figure 3**. Of the genome-wide SNVs  
170 described above, a median of 26 nonsynonymous single-base substitutions and indels occurred within  
171 coding regions (nsSNVs, range 14-42) with a median nonsynonymous: synonymous mutation ratio of 2.3  
172 (range 1.9-3.9) (**Figure 1B**). We additionally performed RNA sequencing in this cohort, aligning with  
173 TopHat and utilizing IGV to manually validate expressed sequence variants (Materials and Methods).  
174 Eighty-five percent of nsSNVs (all but 28) identified by WGS were confirmed by their presence in two or  
175 more sequencing platforms (**Supplementary Table 3**).

176 A number of mutations in orthologs of human cancer genes were present in a single tumor each  
177 and include: *ATF6*, *EPAS1*, *FAT2*, *FAT4*, *FOXA3*, *FOXO1*, *GAB2*, *HRAS*, *KIT*, *KRAS*, *MMP21*, *NRAS*, *PBX1*, and  
178 *XPO1*. Although no recurrent SNVs were seen in the discovery cohort, three genes were mutated in two  
179 cases: *FAT4*, *LRFN2*, and *PTPRJ*. Of these, only *PTPRJ* was validated in multiple platforms in both cases.  
180 Both cases containing somatic *PTPRJ* mutations were mucosal (ND10-166 and ND10-376) and both  
181 putatively contained two hits. To determine the prevalence of mutations in a panel of genes whose  
182 orthologs are known to play a role in human melanomagenesis, as well as the *PTPRJ* gene mutated in  
183 two cases, we performed targeted Sanger sequencing of all protein-coding regions of *BAP1*, *BRAF*, *CDK4*,  
184 *GNA11*, *GNAQ*, *KIT*, *KRAS*, *MDM2*, *MITF*, *NF1*, *NRAS*, *PTEN*, *PTPRJ*, and *TP53* in the expanded cohort.

185 *BRAF*, *CDK4*, *GNAQ*, *MDM2*, *MITF*, and *NF1* were all found to be universally wild-type whereas putative  
186 pathogenic mutations were discovered in *BAP1*, *GNA11*, *KIT*, *KRAS*, *NRAS*, *PTEN*, *PTPRJ*, and *TP53* as  
187 described below and in **Supplementary Table 4**.

188

189 **Somatic copy number and structural variants identified in canine melanoma.** Somatic CNVs in the  
190 discovery cohort were identified by analysis of short-insert whole genome sequencing (SI-WGS) using  
191 established methods (Materials and Methods). A median of 27 focal CNVs (range 4-68), two focal  
192 amplifications with a  $\log_2$  ratio  $\geq 2$  (range 0-61), and eight focal deletions with a  $\log_2$  ratio  $\leq 0.2$  (range 3-  
193 41) were identified in the discovery cohort (**Table 2 and Supplementary Table 5**) comprising 0%-10% of  
194 the genome (**Table 2**). CNVs were additionally identified in this cohort utilizing Illumina CanineHD  
195 BeadChip Single Nucleotide Polymorphism (SNP) arrays and Agilent SurePrint G3 Canine Genome CGH  
196 microarrays as previously described(41, 49) (Materials and Methods) with a high platform concordance  
197 (**Supplementary Figure 4**). CNV analysis was then expanded to a total of 37 melanomas through SNP  
198 arrays in an additional 30 cases in the prevalence cohort (**Table 1 and Supplementary Table 5**). Altered  
199 regions were assessed by GISTIC(50) for statistically significant frequency and amplitude (G-score  $>1.0$   
200 and  $Q < 0.05$ ). Ten significant regions were identified including losses within CFA 1, 11, 15, and X, as well  
201 as gains in CFA10, 11, 13, 30, and X (**Supplementary Table 6**). Nine of 10 GISTIC regions contained genes  
202 and included gains in orthologs of the human cancer genes *MDM2* and *CDK4*. Additional cancer driver  
203 alterations (homozygous deletions of tumor suppressor genes or focal amplifications of oncogenes)  
204 included *CDKN2A* homozygous deletion (3%) and *KIT* focal amplification (8%) (**Supplementary Table 7**).

205 Somatic SVs including translocations, inversions, and duplications, were identified in the  
206 discovery cohort, based on calls from Delly(51) in LI-WGS (Materials and Methods). Between 9 and 65  
207 predicted SVs were identified in each tumor (median 34) and were predominantly inversions (**Table 2**  
208 **and Supplementary Table 8**). No recurrent rearrangements were present. Notable alterations in human  
209 cancer gene orthologs impacted by SVs in single cases include an *ARHGEF12* inversion, a *BIRC3*  
210 inversion, a *CLPTM1L-TERT* translocation, a *DDIT3* inversion, a *MYO5A* translocation, and a *TCF12*  
211 inversion. However, two regions of CFA10 and 30 were found to contain somatic SVs in two or more  
212 tumors. CFA10 rearrangements occurred in five of seven cases, four of which bore alterations in the  
213 region spanning 10 – 12 Mb (also a significant GISTIC region from CNV analysis). CFA30 SVs were also  
214 present in three tumors with alterations occurring within a region spanning 15-24 Mb (also  
215 encompassing a GISTIC region) in each case. Complex chromosomal rearrangements reminiscent of  
216 chromothripsis were observed in four tumors (ND09-345, ND10-370, ND10-361, and ND10-441), with  
217 chained or clustered breakpoints localized to a subset of chromosomes in regions that also contained  
218 copy-number oscillations(52) (**Supplementary Figure 3**). Gene fusions were also identified in RNAseq  
219 data using the TopHat-Fusion software package(53) and IGV verification (Materials and Methods and  
220 **Supplementary Table 8**). Three fusions were identified in two tumors (*OSBPL11-NFKB1* and *DGKA-*  
221 *ABCC5* in ND09-345, and *RPTOR-TIMP2* in ND10-376) for which translocations were validated in LI-WGS  
222 on IGV inspection. No *BRAF* fusions were identified.

223

224 ***BRAF*, *RAS*, *NF1*, and *KIT* mutations.** Approximately 90% of human cutaneous melanomas are driven in  
225 part by *BRAF*, *RAS*, *NF1*, and *KIT* mutations that confer constitutive mitogenic signaling through the  
226 MAPK pathway(24, 45, 54). However, these alterations are far less common in human mucosal and acral  
227 melanomas(20, 22, 23, 55-57). No somatic alterations in *BRAF* were identified within any platform in our  
228 canine melanoma cohort. However, *RAS* family members, whose protein products are predicted to  
229 share 100% sequence identity with their human orthologs, were the most commonly mutated genes in  
230 aggregate, occurring in 24% of cases in human-conserved hotspots (**Figure 1C and 2A**). *NRAS* codon 61

231 (Q61R/H/K) and *KRAS* codon 12 (G12C) mutations occurred each in four cases while a single case bore  
232 an *HRAS* Q61R mutation (nine total RAS mutations). All three acral and two cutaneous cases bore *NRAS*  
233 or *KRAS* mutations, while only 4/31 (13%) of mucosal cases bore an *NRAS*, *KRAS*, or *HRAS* mutation.  
234 Although *NF1* copy number losses occurred in six cases, no homozygous deletions or truncating  
235 mutations were identified (**Supplementary Table 7**). *KIT* mutations were present in one cutaneous and  
236 two mucosal tumors (**Supplementary Tables 3 and 4**). In the cutaneous case, the mutation results in a  
237 glutamine (Q) to arginine (R) change in codon 396, notably a site of variation between canine and  
238 human orthologs, a change that is not predicted to be damaging by PROVEAN, and may constitute a  
239 germline SNP, but germline DNA was not available in this case(58). *KIT* mutations in the mucosal cases  
240 included an in-frame deletion of amino acids 560-562, a likely damaging mutation in a commonly  
241 mutated region of the human ortholog, as well as an aspartic acid (D) to valine (V) change in codon 815  
242 corresponding to the most common hotspot D816V mutations occurring in the kinase domain of *KIT* in  
243 human cancers (**Supplementary Figure 5**)(59). Copy number gains encompassing *KIT* were also present  
244 in 10 samples (eight mucosal, one acral, and one cutaneous – Jones, 17CM98, ND10-104, ND10-158,  
245 ND10-365, ND10-370, ND10-376, ND10-361, ND10-363, and ND10-441), although no focal amplifications  
246 were identified (**Supplementary Table 7**).

247  
248 ***PTPRJ* Mutations.** The most commonly mutated gene in this cohort was the putative tumor suppressor  
249 gene *PTPRJ*, not previously shown to have frequent inactivating point mutations in cancer (**Figure 1C**  
250 **and 2C**). *PTPRJ* (also known as density-enhanced phosphatase 1 (DEP-1) or CD148) is a protein tyrosine  
251 phosphatase receptor originally discovered by virtue of its overexpression in dense cultures of human  
252 lung fibroblasts(60). It has since been shown to be frequently involved in allelic loss or loss of  
253 heterozygosity (LOH) in human cancers and mouse models(61, 62) and to potentially play a role in  
254 oncogenesis in diverse cancer types, but somatic homozygous deletions or truncating mutations have  
255 yet to be described in cancer from any species and its tumor suppressor status remains controversial(63-  
256 71). Canine and human orthologs share 70% sequence identity with a highly conserved C terminus  
257 containing the protein tyrosine phosphatase catalytic domain that is nearly 100% identical between  
258 species (**Supplementary Figure 6**). Sequencing of *PTPRJ* across all 37 tumors revealed nine mutations in  
259 seven cases (all mucosal), comprising 19% of all tumors and 23% of mucosal cases. Six frameshifts or  
260 stop gains were discovered in addition to two splice site mutations, a C-terminal 10-amino acid deletion,  
261 and a single predicted damaging missense mutation. Two cases – ND10-190 and ND10-376 – contained  
262 two mutations each, consistent with putative bi-allelic inactivation of a tumor suppressor gene. Further,  
263 LOH was evident by analysis of adjacent SNPs in WGS data in case ND10-166 bearing the M110fs  
264 mutation (**Supplementary Table 10**). Consistent with this finding, the *PTPRJ* frameshift in the ND10-166  
265 tumor occurred at an allele ratio of 61% in DNA and 100% in RNA.

266  
267 ***MDM2* Amplifications and *TP53* Mutations.** Inactivation of the p53 network is a critical step in  
268 tumorigenesis in nearly all cancers(72). Both truncating *TP53* mutations and amplifications of *MDM2*, a  
269 negative regulator of p53, are key routes to p53 inactivation(73). Although *TP53* mutations and *MDM2*  
270 amplifications in human melanoma less common(23-25, 45, 54, 56), 16/37 (43%) of the cases in our  
271 cohort of canine melanoma bore focal amplifications of *MDM2* or truncating *TP53* mutations (**Figure**  
272 **1C**). A recurrent focal amplification on CFA10 was identified by whole genome analysis in three of seven  
273 tumors in the discovery cohort with extended SNP array analysis in the prevalence cohort revealing an  
274 additional eight tumors bearing these amplifications (minimal region 10.9-11.8 Mb) (**Figure 1C and 2C**).  
275 In total, 11/38 cases (29%) bore this amplification involving seven genes, with *MDM2* being the likely  
276 amplification target (**Figure 2B**). All such amplifications occurred in mucosal melanomas (11/31, 35%).

277 *CDK4*, a cancer gene 10 Mb proximal to *MDM2* in both human and canine genomes and often the target  
278 of bipartite amplification alongside *MDM2*(74, 75), was co-amplified in three of these cases. Twenty  
279 tumors were additionally assessed for *MDM2* expression by IHC (**Supplementary Table 11 and**  
280 **Supplementary Figure 7**). Three of five cases with *MDM2* focal amplifications also showed prominent  
281 *MDM2* staining while no cases lacking *MDM2* amplifications were positive by IHC.

282 We additionally discovered seven tumors with mutations in *TP53* whose protein product shares  
283 80% identity with its human ortholog (**Supplementary Figure 8**). Three of these mutations were  
284 truncating – a homozygous T90X in ND10-252, heterozygous K151fs in ND11-201, and a heterozygous  
285 Q306X in ND10-564 (**Figure 2D and Supplementary Table 4**). Of the three missense mutations, R145C  
286 and R270H were predicted to be damaging. R145C occurred in two tumors and R270H in a single tumor,  
287 with both mutations confirmed somatic through analysis of matched germline DNA. Codon 270 in canine  
288 *TP53* is homologous to codon 282 in human *TP53*, the fifth most common hotspot for mutations in  
289 human cancer(59). The missense G290R variant is a likely SNP. It occurs in a tumor for which matched  
290 germline DNA is unavailable and it is predicted to be neutral, although it has not been previously  
291 described(76-78). In keeping with findings in other cancers, no sequence mutations were present in  
292 *MDM2* and *MDM2* amplifications were mutually exclusive with *TP53* mutations. Further, *TP53* and  
293 *MDM2* alterations were mutually exclusive with *RAS* mutations in all but one case (ND10-748, **Figure 1**).

294  
295 **Pathway dysregulation in canine melanoma.** Common genomic subtypes of human cutaneous  
296 melanoma (*BRAF*, *RAS* (N/H/K), and *NF1* in 90% of cases) that engage oncogenic signaling through the  
297 MAPK pathway are less common in human non-cutaneous melanoma and in canine malignant  
298 melanoma (24% of cases here, **Figure 1C**). Therefore, to undertake unbiased identification of pathways  
299 contributing to canine melanomagenesis, we performed pathway analysis using WGS data from the  
300 discovery cohort. We generated a list of all genes bearing nonsynonymous mutations, lying within  
301 chromosomal breakpoints or significant CNV regions from GISTIC (n=1047) in order to determine  
302 enrichment of these mutated genes within specific KEGG and Reactome pathways (Materials and  
303 Methods)(79-81). Network analysis of the affected genes identified 97 pathways with significant  
304 Benjamini-Hochberg corrected *P*-values (**Supplementary Table 12**). The most significantly enriched  
305 pathways were Insulin Receptor Substrate (IRS)-mediated signaling, and IRS-related events, for which  
306 23% (19 genes) of the pathway members are mutated in this cohort. Notably, these pathways converge  
307 on MAPK and PI3K mitogenic signaling and contain core pathway members such as *FGFs*, *EIF4G1*, *HRAS*,  
308 *KRAS*, *NRAS*, and *RPTOR*. Indeed the majority of the enriched pathways contain members of MAPK, PI3K,  
309 or growth factor receptor signaling (e.g. PI3K cascade *P*=0.002, mTOR signaling *P*=0.008, signaling by Rho  
310 GTPases *P*=0.012, VEGF signaling *P*=0.017, RAF activation *P*=0.017, melanoma signaling *P*=0.021, RAS  
311 signaling *P*=0.031, and MEK activation *P*=0.036) and, in many cases, intersections with *MDM2* signaling.

## 312 313 **DISCUSSION**

314 Melanoma is a clinically significant disease in dogs, the study of which holds untapped potential for  
315 developing clinical approaches to improve the lives of pet dogs while also informing human melanoma  
316 biology and treatment. Few treatment options are available for locally advanced or metastatic canine  
317 melanoma in part because the molecular etiology is still largely unknown. Similarly, limited molecular  
318 understanding of rare sun-shielded and *BRAF*<sup>wt</sup> subtypes of human melanoma has constrained clinical  
319 innovation. In order to identify the molecular alterations underlying canine melanoma, we undertook a  
320 comprehensive multi-platform genomic investigation. Our integrated analysis confirms that although  
321 these tumors are driven by mutational landscapes distinct from those in human cutaneous melanoma,  
322 they share important similarities with *BRAF*<sup>wt</sup> and rare histological subtypes of human melanoma.

323 These data not only guide biological and therapeutic studies in canine melanoma, but they also lend  
324 further support for the use of the naturally occurring canine model in comparative studies of human  
325 cancers.

326 This study builds on knowledge of the cytogenetic landscape of canine melanoma(41) to provide  
327 a comprehensive view of numbers and types of somatic coding mutations in this cancer. Given the  
328 dearth of genomic data for canine melanoma, we initially focused here on collecting primary tumors  
329 from diverse breeds. Although numbers were too small to power such analyses, we saw no significant  
330 breed-associated alterations in this cohort. Breed-specific somatic mutational landscapes have been  
331 shown to occur for other canine cancers such as lymphoma(82). Future expanded study of breed-  
332 specific cohorts will be critical for further understanding the role of germline variation in shaping  
333 somatic cancer landscapes across species. It will also be important to further define subtype differences  
334 in expanded cohorts of canine acral and cutaneous tumors as well as benign and precursor lesions.

335 Overall, the genomic landscapes of human melanoma vary by anatomic site and degree of sun  
336 exposure(22, 26, 57). Cutaneous sun-exposed melanoma is characterized both by high point mutation  
337 frequencies linked to UV damage(45) and also only modest burdens of structural variation. In contrast,  
338 sun-shielded and non-cutaneous melanomas harbor a low point mutation, but high structural mutation  
339 burden. Here, we establish that the canine malignant melanoma genome landscape resembles that  
340 reported in human sun-shielded melanoma. Canine melanoma of all subtypes in our discovery cohort is  
341 likely sun-shielded, including cutaneous tumors which occur in densely hair-bearing skin, although  
342 cropping or shaving during summer months may in some cases increase UV exposure. In keeping with  
343 this status, WGS in this cohort provides a deep view of genome-wide mutation burden revealing low  
344 point mutation frequencies (median 2.03 somatic mutations per Mb) similar to that seen in human acral  
345 and mucosal melanoma WGS data from Hayward *et al.* 2017 (**Figure 3A**)(26). This low point mutation  
346 burden relative to human sun-exposed melanoma has potential bearing on expected responses to  
347 immunotherapy such as anti-CTLA4 and anti-PD1 checkpoint blockade. Numerous studies have shown a  
348 clear positive correlation between mutation burden, abundance of neoantigens, and clinical benefit in  
349 human melanoma and other cancers(83, 84). Nonetheless, other molecular determinants of response to  
350 immunotherapy exist beyond simply mutation burden and the activity of such agents in canine  
351 malignant melanoma remains to be determined. Notably, CNV and SV burden from our WGS in canine  
352 malignant melanoma was markedly lower than all subtypes as described in Hayward *et al.* (**Figure 3B**  
353 **and 3C**) (26).

354 WGS additionally provides a deep view of genome-wide mutation signatures. High point  
355 mutation burden in sun-exposed cutaneous melanoma is understood to result from UV-induced over-  
356 representation of C>T transitions occurring in dipyrimidines versus non-dipyrimidines. UV-induced C>T  
357 mutations occurring in dipyrimidines comprise a low proportion of total SNVs in our cohort (25%),  
358 reflective of human sun-shielded cutaneous, mucosal and acral melanoma, in contrast to 85-90% of C>Ts  
359 occurring in dipyrimidines in human sun-exposed melanoma (**Figure 3C**)(24, 26, 45, 55, 56, 85). This  
360 lends support for a non-UV etiology of canine melanoma.

361 The genome-wide SNV spectrum further revealed that C>T transitions in CpGs were the most  
362 common sequence alterations (**Supplementary Figure 2A**). These mutations correlate with age in  
363 human cancers and are due to spontaneous deamination of 5-methylcytosine(46). Enrichment for these  
364 mutations in canine melanoma is not surprising given that the largest risk factor for cancer in humans  
365 and dogs is biological (not chronological) age(86-91) and that the mean age of these dogs at the time of  
366 surgical resection was 13 years (range: 10 – 16). Relative to the average number of human somatic  
367 mutations, these data provide further evidence that not only cancer incidence, but also mutational  
368 burden increases with biological, rather than chronological, age(92). Commonly observed mutational



369 patterns in human melanoma such as kataegis were not observed, although four tumors exhibited  
370 clustered or chained translocations suggestive of breakage-fusion-bridge events due to telomere crisis  
371 or of chromothripsis, in which one or a few chromosomes undergo punctuated shattering and  
372 reassembly events(52). Such events have been linked to poor outcome in human melanoma(93) and  
373 may be enriched in tumors with p53 dysfunction or those that lack means to extend telomeres(94, 95).  
374 Notably, we show here that *MDM2* and mutually exclusive *TP53* alterations are common in canine  
375 melanoma. Similarly, inactivating p53 mutations have been found in human mucosal and acral  
376 melanoma, suggesting p53 pathway dysregulation may be crucial in non-UV induced melanoma  
377 development. Further, UV-induced *TERT* promoter mutations are common in human cutaneous  
378 melanoma, and, although they are rare in sun-shielded subtypes, these subtypes have been shown to  
379 bear enrichment for other types of mutation that drive *TERT* overexpression such as SVs and CNVs(57).  
380 The cutaneous tumors in this cohort do not bear somatic *TERT* promoter mutations or other known  
381 genetic lesions that would enable telomere extension. Thus, telomere crisis and the survival of  
382 structurally aberrant genomes may play a significant role in the molecular etiology of canine and non-UV  
383 induced human melanoma.

384 Our comprehensive analysis of canine melanoma reveals that most canine melanomas bear a  
385 low coding mutation burden and are also less structurally complex than human melanoma. Two WGS  
386 approaches coupled with array-based platforms have enabled deep interrogation of these changes,  
387 complementing recent cytogenetic analyses of this tumor type(41). Significant copy number gains on  
388 CFA10 and 30 that have been reported as a defining signature of these lesions are recapitulated in this  
389 dataset (**Supplementary Table 6**). Our multi-platform approach was also able to further elucidate  
390 complex chromosomal rearrangements present in these regions. Both regions are involved in multiple  
391 intra- and inter-chromosomal structural events across this cohort (**Supplementary Table 8**). Additionally,  
392 focal amplification of the CFA10 10-12MB region encompasses *MDM2*, a gene which is known to drive  
393 human cancers and is currently being explored as a drug target in TP53 wild type tumors(96). CNVs  
394 associated with canine melanoma also include gain of CFA13 and loss of CFA22. While not statistically  
395 significant via GISTIC in this cohort, both events are present in individual samples. Overall, extensive  
396 copy number and structural variation suggest high levels of large-scale chromosome instability, i.e. gain  
397 and loss of whole chromosomes or chromosome arms. Intriguingly, mutually exclusive focal  
398 amplification of *MDM2* or inactivating mutation in *TP53* have been shown to be enriched in *BRAF*-,  
399 *NRAS*-, and *NF1*-wild-type human melanoma, although human *TP53*-mutant melanomas tend to also  
400 display higher mutation burden and presence of C>T transitions(97). Taken together the high degree of  
401 structural complexity, the lack of *TERT* mutations or telomere-lengthening mechanisms, and the  
402 frequency of *MDM2/TP53* mutations all suggest that chromosome instability plays a key role in canine  
403 melanomagenesis.

404 In the discovery cohort, putatively pathogenic somatic mutations in orthologs of human cancer  
405 genes were present in a single tumor each including *ATF6*, *EPAS1*, *FAT2*, *FAT4*, *FOXA3*, *FOXO1*, *GAB2*,  
406 *HRAS*, *KIT*, *KRAS*, *MMP21*, *NRAS*, *PBX1*, and *XPO1* (**Supplementary Table 3**). Of the 14 melanoma  
407 hallmark genes evaluated in the prevalence cohort (including *PTPRJ*), an additional 24 putatively  
408 pathogenic somatic mutations were identified in seven genes – *NRAS*, *TP53*, *PTPRJ*, *KIT*, *KRAS*, *GNA11*,  
409 and *BAP1* (**Supplementary Table 4**). Overall, across discovery and prevalence analyses, RAS gene family  
410 members were the genes most commonly bearing somatic SNVs, occurring in 24% of cases (**Figure 1C**  
411 **and 2A**), followed by *TP53* and *PTPRJ* mutations each in 19% of cases, *KIT* in 8% and *PTEN* in 5%.  
412 Combined, these mutations most commonly impact proliferative and cell cycle/apoptosis pathways in  
413 patterns similar to those observed in human melanoma (**Figure 3D**). These findings also suggest that  
414 both MAPK pathway inhibition (via MEK inhibitors) or p53 pathway inhibition (via MDM2 inhibitors) may

415 be of equal relevance in canine melanoma as they are in human(38).

416 The oncogenic MAPK pathway is critically important in many cancers given its central role in  
417 conveying extracellular signals to the nucleus in order to regulate cancer hallmarks including  
418 proliferation, invasion, metastasis, and angiogenesis. The majority of human cutaneous melanomas are  
419 driven in part by constitutive activation of the MAPK pathway through mutation of genes such as *BRAF*,  
420 *NRAS*, *NF1*, *KIT*, *GNAQ*, and *GNA11*, often in a mutually exclusive pattern(98). The high frequency of  
421 these mutations has motivated the TCGA classification of these tumors according to MAPK mutation  
422 status: *BRAF* (~50% of cases), *RAS* (~30%), *NF1* (~15%), and TWT (~10%)(97). These genomic categories  
423 are correlated with clinical, pathological, molecular, and biological features of melanoma and thus may  
424 comprise distinct subtypes. However, less common histological subtypes of melanoma such as mucosal,  
425 acral, and uveal melanoma bear unique mutation spectra that are not uniformly centered on canonical  
426 activating mutations in the MAPK pathway. Correspondingly, it has been shown that *BRAF* mutations are  
427 exceedingly rare in predominantly oral canine malignant melanoma and, to date, few alterations in  
428 other MAPK members have been discovered. These findings were recapitulated in our cohort, which  
429 showed no canonical *BRAF* or *NF1* mutations. Nonetheless, MAPK and/or PI3K signaling have been  
430 shown to be activated in nearly all cases(99). Additional mutations impacting the MAPK and PI3K  
431 pathways include three *KIT* mutations, two *PTEN* mutations, and one *GNA11* mutation. In total, 35% of  
432 mucosal and 43% of all canine melanomas bear an alteration impacting the MAPK pathway (**Figures 1C**  
433 **and 3D**). Prior to our studies described here, the mutations underlying such activation have remained  
434 largely unknown.

435 Here we show a complete absence of somatic *BRAF* mutations (SNVs, CNVs, translocations, or  
436 fusions encompassing the *BRAF* locus) in canine malignant melanoma in keeping with prior studies(32,  
437 37, 41, 100). We also did not uncover truncating SNVs in or homozygous deletions of *NF1*. A higher  
438 proportion of our cohort bear *RAS* mutations than the 6-13% previously described(32, 99), although  
439 prior studies have focused almost exclusively on *NRAS* exons one and two. All three major RAS family  
440 members are highly conserved (100% protein identity) between canine and human. In humans, of these  
441 family members, malignant melanomas predominantly bear *NRAS* mutations with only very rare *KRAS*  
442 and *HRAS* mutations. In our cohort, we found four *NRAS* codon 61 alterations (11%), four *KRAS* G12C  
443 mutations and one *HRAS* Q61R mutation. Further, four of these RAS alterations (two *NRAS*, one *KRAS*,  
444 and one *HRAS* mutation) occur in mucosal tumors, a frequency of 13% in this subtype. However, in our  
445 cohort all three acral tumors and both cutaneous tumors had detectable *RAS* alterations (three *KRAS*  
446 and two *NRAS* mutations). This unusual pattern of *RAS* mutation in canine melanoma may reflect  
447 important differences in biological, tissue, and species specificities of RAS family members.

448 These data point to the genomic lesions underlying MAPK and PI3K activation in a substantial  
449 proportion of canine melanomas, and to subtle genetic differences in disease subtypes within and  
450 across species. Most striking is the discovery of a putative novel tumor suppressor gene, *PTPRJ*, a  
451 receptor-type protein tyrosine phosphatase, which has been genetically and functionally implicated in  
452 cancer (61, 62), but for which clear genetic mechanisms of inactivation have yet to establish its definitive  
453 role as a canonical tumor suppressor gene. *PTPRJ* consists of an extracellular domain with eight  
454 fibronectin III motifs, a transmembrane domain, and an intracellular catalytic domain. It was originally  
455 cloned from HeLa cells and characterized by overexpression and hyper-activation in dense cultures of  
456 fibroblasts, by regulation of contact inhibition, and by its role in regulation of cancer cell proliferation  
457 and invasion(60, 101-106). Early genetic studies of quantitative trait loci for mouse cancer susceptibility  
458 with homologous regions in human cancers pointed to recurrent *PTPRJ* deletions, LOH, and missense  
459 mutations in small cohorts of colorectal (49%), lung (50%), and breast (78%) carcinomas in addition to a  
460 correlation between *PTPRJ* LOH and colorectal cancer progression(61, 62). Additional sequencing studies

461 in larger cohorts have identified nonsynonymous SNPs in the extracellular fibronectin repeats associated  
462 with risk of developing thyroid, colorectal, head and neck squamous cell, and esophageal cancers(67, 70,  
463 107-109). More recently, a subclonal K1017N missense mutation in the non-catalytic cytoplasmic  
464 domain of PTPRJ was identified in a primary breast tumor with significant enrichment in a brain  
465 metastases and patient-derived xenograft(110). PTPRJ substrates that may mediate its tumor  
466 suppressive potential include ERK1/2, Akt, various receptor tyrosine kinases, and Src kinases(42, 111-  
467 115). However, *Ptprj* knockout mice have normal development with no cancer predisposition and thus  
468 inactivation of this gene does not appear to be sufficient to induce tumorigenesis(65). Across all TCGA  
469 studies published to date, the frequency of mutations and/or homozygous deletions appears to be low  
470 (400 altered cases), although truncating mutations have been found to comprise 31 of the 257  
471 mutations identified alongside 56 missense mutations predicted to be of medium or high impact  
472 (**Supplementary Figure 9 and Supplementary Table 13**)(116, 117). Only 10 mutations are present in the  
473 TCGA human cutaneous melanoma data set (a single homozygous deletion and nine missense  
474 mutations) with two missense mutations in desmoplastic melanoma and no detectable mutations in  
475 uveal melanoma. However, a related receptor-type protein tyrosine phosphatase, *PTPRD*, is thought  
476 play a role in regulation of STAT3 signaling and has been frequently implicated as a tumor suppressor in  
477 human cancers through inactivating somatic mutation, focal deletion or methylation in glioma,  
478 melanoma, neuroblastoma, colorectal, liver, head and neck, and lung cancers(118-121). In human  
479 cutaneous melanoma, *PTPRD* is deleted or truncated in 9-12% of cutaneous cases, but has not been  
480 determined to occur at high frequency in rare histological subtypes(49, 55, 56, 119, 122).

481 Here, we present the first report of recurrent somatic truncating mutations in *PTPRJ* in a  
482 naturally occurring cancer. We have discovered seven cases (19%) of canine melanomas bearing somatic  
483 *PTPRJ* mutations. Canine and human *PTPRJ* orthologs share 70% sequence identity with a highly  
484 conserved C-terminus containing the protein tyrosine phosphatase catalytic domain (**Supplementary**  
485 **Figure 6**). Sequencing of *PTPRJ* across all 38 tumors revealed nine mutations in seven cases (seven  
486 mucosal and one uveal) comprising 19% of all tumors and 23% of mucosal cases. Six frameshifts or stop  
487 gains were discovered in addition to one splice site mutation, a C-terminal 10-amino acid deletion, and a  
488 single predicted damaging missense mutation. Two cases – ND10-190 and ND10-376 – contained two  
489 mutations each, consistent with bi-allelic inactivation of a tumor suppressor gene. Further, loss of  
490 heterozygosity (LOH) was evident by analysis of adjacent SNPs in WGS data in case ND10-166 bearing  
491 the M110fs mutation (**Supplementary Table 10**). Although regional LOH on chromosome 18 was  
492 observed by SNP array in three of six cases bearing single mutations in *PTPRJ*, these regions were not  
493 observed to directly overlap the coding region of *PTPRJ*. Overall, the enrichment for *PTPRJ* truncating  
494 mutation in canine malignant melanoma bears intriguing implications both for a previously  
495 underappreciated role for this gene in human melanoma (e.g. through as-yet understudied roles for  
496 hemizygous deletion(123) and/or epigenetic modifications) and for the possibility of unique mechanisms  
497 of tumorigenesis across species.

498 Through deep integrated genomic analysis combining WGS, LI-WGS, RNA sequencing, aCGH,  
499 SNP arrays, and targeted Sanger sequencing we have determined that canine melanoma is driven by  
500 extensive chromosomal instability and frequent dysregulation of MAPK and cell cycle/apoptosis  
501 pathways. In keeping with prior comparative melanoma studies that have incorporated histology,  
502 targeted sequencing, and aCGH(32, 36, 38, 41), this work highlights the striking resemblance of canine  
503 malignant melanoma to sun-shielded, *BRAF*wt subtypes of human melanoma. Finally, we have  
504 additionally discovered a putative novel tumor suppressor that may reflect unique species-specific  
505 biology and/or may highlight a tumor suppressive axis more subtly altered and as-yet underappreciated  
506 in human melanoma. This work bears immediate relevance for development of improved diagnostic and

507 treatment approaches in canine malignant melanoma and provides further evidence to credential the  
508 naturally occurring canine melanoma model for study of relevant genomic subsets of human melanoma.  
509

## 510 **MATERIALS AND METHODS**

### 511 *Clinical samples, histopathology and sample assessment*

512 Tumor samples and whole blood were obtained under institutional review protocols at the Van Andel  
513 Research Institute in collaboration with local specialty veterinary clinics. Material was collected at  
514 surgery, immediately snap frozen, and preserved in optimal cutting temperature (OCT) compound.  
515 Patient matched control DNA was obtained from peripheral blood mononuclear cells. Each resected  
516 tumor was evaluated by a board certified pathologist (BD) to estimate tumor content and extent of  
517 tissue heterogeneity. Diagnosis of malignant melanoma was histologically confirmed according to  
518 criteria defined by the American College of Veterinary Pathologists in addition to criteria recently  
519 established by comparative analyses of canine and human melanoma focusing on architecture,  
520 pigmentation, and the presence of differentiation markers(32, 99, 124).

521

### 522 *Immunohistochemistry*

523 Two tissue microarrays (TMAs), designated Dog MEL A TMA and Dog MEL B TMA, consisted of 96  
524 individual dogs and 131 tissue samples placed in duplicate and two tissue samples placed in  
525 quadruplicate (272 array spots). Multiple tumors from nine dogs were present on the array and multiple  
526 samples from varying sites within the same tumor were present for twelve dogs. Additionally, non-  
527 melanoma stromal or control normal tissues were included. TMAs were H&E-stained and evaluated via  
528 routine immunohistochemical procedures for melanoma cocktail (anti-melan A, anti-melanosome, and  
529 anti-tyrosinase), and antibodies to vimentin, MDM2 and p53. Samples scoring positive for MDM2  
530 staining were then confirmed for positive staining with melanoma cocktail and re-evaluated for p53  
531 staining. Positive staining was counted if at least one of the two duplicate samples could be evaluated  
532 for both MDM2 and melanoma cocktail on the TMA. Antibodies were purchased from Santa Cruz  
533 Biotechnology or Cell Marque. A total of 98 dogs and 189 spots/samples (132 tumors) met these criteria  
534 for evaluation for MDM2 protein expression by IHC. Of these 98 dogs, 18 dogs (17%) had melanocytic  
535 tumors positive for MDM2 staining in 33 spots/samples (25%). MDM2 staining was predominantly  
536 cytoplasmic highest intensity at junction between epithelial and subepithelial (submucosa, dermis).  
537 Staining was observed in both malignant pigmented and amelanotic melanoma and benign  
538 melanocytomas. Most intense staining (4+ cytoplasmic and nuclear) was observed in a benign cutaneous  
539 melanocytoma from a boxer that had additionally a malignant melanoma (negative for MDM2 staining  
540 on the array) and multiple cutaneous mast cell tumors.

541

### 542 *Nucleic acid extraction from tumor tissue and blood*

543 Tissue was disrupted and homogenized in Buffer RLT plus (Qiagen AllPrep DNA/RNA Mini Kit), using the  
544 Bullet Blender™, Next Advance, and transferred to a microcentrifuge tube containing Buffer RLT plus  
545 and 1.6 mm stainless steel beads or 0.9 mm–2.0 mm RNase free stainless steel beads. Blood leukocytes  
546 (buffy coat) were isolated from whole blood by centrifugation at room temperature and resuspended in  
547 Buffer RLT plus. All samples were homogenized, centrifuged at full speed, and lysates were transferred  
548 to Qiagen AllPrep spin columns. Genomic DNA and RNA were then purified following the manufacturer's  
549 protocol. DNA was quantified using the Nanodrop spectrophotometer and quality was assessed from  
550 260/280 and 260/230 absorbance ratios. RNA was analyzed on the Agilent Bioanalyzer RNA 6000 Nano  
551 Chip to validate RNA integrity (RIN≥7.0).

552

### 553 *Library construction and next generation sequencing*

554 Three µg of genomic DNA from each sample was fragmented to a target size of 300–350 base pairs (bp).  
555 Overhangs in the fragmented samples were repaired and adenine bases were ligated on. Diluted paired

556 end Illumina adapters were then ligated onto the A-tailed products. Following ligation, samples were run  
557 on a 3% TAE gel to separate products. Ligation products at 300 bp and 350 bp were selected for each  
558 sample, isolated from gel punches, and purified. 2× Phusion High-Fidelity PCR Master Mix (Finnzymes;  
559 catalog#F-531L) was used to perform PCR to enrich for these products. Enriched PCR products were run  
560 on a 2% TAE gel and extracted. Products were quantified using Agilent's High Sensitivity DNA chip  
561 (catalog#5067-4626) on the Agilent 2100 Bioanalyzer (catalog#G2939AA).

562 Long insert whole genome libraries were constructed as previously described(125) with the  
563 following modifications: 1100ng inputs were used; following DNA fragmentation, a bead purification  
564 was performed at a 1:1.8 (sample volume: bead volume) ratio; a 1% size selection gel was used; and  
565 during library enrichment, 10 PCR cycles was used. Libraries were clustered onto Illumina V3 flowcells  
566 (San Diego, CA) using Illumina's TruSeq PE Cluster Kit V3 (cat#PE-401-3001) and sequenced for paired  
567 100bp reads using Illumina's TruSeq SBS Kit V3 (cat#FC-401-3002, n=3) on the Illumina HiSeq.

568 10 ng of total RNA was used to generate whole transcriptome libraries for RNA sequencing.  
569 Using the Nugen Ovation RNA-Seq System (cat#7100-08), total RNA was used to generate double  
570 stranded cDNA, which was amplified using Nugen's SPIA linear amplification process. Amplified cDNA  
571 was input into Illumina's TruSeq DNA Sample Preparation Kit – Set A (cat#FC-121-1001) for library  
572 preparation. In summary, 1 µg of amplified cDNA was fragmented to a target insert size of 300 bp and  
573 end repaired. Samples were then adenylated and indexed paired end adapters were ligated. Ligation  
574 products were run on a 2% TAE gel and size selected at 400 bp. Ligation products were isolated from gel  
575 punches and purified. Cleaned ligation products were input into PCR to enrich for libraries. PCR products  
576 were cleaned and quantified using the Agilent Bioanalyzer.

577 Tumor and normal libraries were prepared for paired end sequencing as described above.  
578 Clusters were generated using Illumina's cBot and HiSeq Paired End Cluster Generation Kits (catalog#PE-  
579 401-1001) and sequenced on Illumina's HiSeq 2000 using Illumina's HiSeq Sequencing Kit (catalog#FC-  
580 401-1001).

#### 581 *Next generation sequencing data analysis*

582 BCL to FASTQ file conversion was performed using Illumina's BCL converter tool. Read alignment was  
583 performed with BWA (Burrows-Wheeler Aligner)(126) using the canine reference genome CanFam 3.1.  
584 Aligned BAMs were indel (insertion/deletion) realigned and recalibrated using GATK(127, 128) and  
585 duplicate pairs marked using Picard (<http://broadinstitute.github.io/picard/>). Variants were called using  
586 Strelka(129), Seurat(130) and MuTect(131) and calls were annotated according to dbSNP 139, SNPs on  
587 the Illumina CanineHD BeadChip, and SnpEff-3.5(132). Final somatic SNVs were called by at least 2/3  
588 callers. LI-WGS data were utilized for CNV and SV detection. For CNV detection, read depths at every  
589 100 bases across sequenced regions were determined. Next, normalized  $\log_2$  fold-changes between  
590 tumor and normal were calculated and a smoothing window applied. Tumor allele frequencies of known  
591 heterozygous germline SNPs were utilized to evaluate potential false positives and correct biases.  
592 Finally, the Circular Binary Segmentation algorithm(133) was used to correct  $\log_2$  fold-changes. For  
593 mutation burden metrics, a focal CNV is included if the  $\log_2$  change is  $\geq |2|$ . SV detection was  
594 performed utilizing Delly(51). A minimum tumor allele ratio of 0.10 and a minimum quality score of 20 is  
595 required for an SV to be called.

596  
597 RNA sequencing data in FASTQ format from the Illumina HiSeq was checked for quality using  
598 cycle-by-cycle quality plots and biases, such as GC content. Reads were aligned to the canine reference  
599 genome CanFam 3.1 using the TopHat spliced aligner to generate alignment files in BAM  
600 format(134). These data were utilized for validation of expressed sequence variants in IGV. Gene fusions  
601 were also identified in RNAseq data using the TopHat-Fusion software package(53) and IGV verification.

602 Results were reported in tables showing p-values (adjusted for multiple testing) and normalized  
603 abundance data in terms of FPKM (fragments per kilo-base of transcript per million mapped  
604 reads) which were also examined manually. Gene and transcript annotations were downloaded from  
605 ENSEMBL (CanFam 3.1.68) and germline SNPs filtered out using publicly available canine SNP data (71-  
606 73).

607

#### 608 *Data access*

609 Next generation sequencing data from this study have been submitted to the NCBI Biosample Database  
610 (<http://www.ncbi.nlm.nih.gov/biosample/7196161>) under study ID SUB2752127 and accession numbers  
611 SAMN07196161, SAMN07196162, SAMN07196163, SAMN07196164, SAMN07196165, SAMN07196166,  
612 and SAMN07196167.

613

#### 614 *Pathway analysis*

615 A list of 1,405 genes with single nucleotide variation or structural variation or copy number variation  
616 from the discovery cohort were analyzed using ClueGo4(79), a Cytoscape plug-in, to create a  
617 functionally organized pathway network. Kappa scores were then used to measure association between  
618 the networks. Functional networks were created with a minimum Kappa score threshold of 0.5 and a  
619 minimum of 3 affected genes in every network forming at least 10% of the total associated genes in that  
620 particular network. The genes were assigned to the networks based on the predefined pathways from  
621 KEGG, REACTOME and Wiki Pathways. 97 pathways were obtained, all with Benjamini-Hochberg  
622 corrected P-value <0.05. These pathways were grouped together based on inter-term kappa score and  
623 named by the most significant pathway in the respective groups.

624

#### 625 *PCR amplification and Sanger sequencing analysis*

626 PCR amplification of 15 genes (*NRAS*, *KRAS*, *BRAF*, *GNA11*, *GNAQ*, *PTPRJ*, *TP53*, *MDM2*, *BAP1*, *CDK4*,  
627 *PTEN*, *c-KIT*, *MITF* and *NF1*) was performed using primers targeting all coding exons as shown in  
628 Supplementary Table 9. All amplification reactions were performed using Platinum Taq DNA Polymerase  
629 #10966-034 (Life Technologies; Carlsbad, CA). Briefly, each primer pair was mixed with 10 ng of genomic  
630 DNA and subjected to the following cycling parameters: 94°C for 2 min., 3 cycles at each temperature:  
631 30 sec. at 94°C, 30 sec. at 60-57°C, 45 sec. at 72°C; 25 cycles: 30 sec. at 94°C, 30 sec. at 62°C, 45 sec. at  
632 72°C; final extension of 5 min. at 72°C. PCR amplicons were sequenced using M13 forward and reverse  
633 primers at the Arizona State University's DNA Lab (Tempe, AZ).

634

#### 635 *Array comparative genomic hybridization*

636 Oligo array CGH (aCGH) was performed by co-hybridization of tumor (test) DNA and a common  
637 reference DNA sample, where the latter comprised an equimolar pool of genomic DNA samples from  
638 multiple healthy individuals of various breeds. DNA was labeled using an Agilent SureTag Labeling Kit  
639 (Agilent Technologies, Santa Clara, CA) with all test samples labeled with Cyanine-3-dCTP and the  
640 common reference sample labeled with Cyanine-5-dCTP. Fluorochrome incorporation and final probe  
641 concentrations were determined using routine spectrophotometric parameters with readings taken  
642 from a Nanodrop1000. Fluorescently labeled test and reference samples were co-hybridized to Canine  
643 G3 180,000 feature CGH arrays (Agilent, AMADID 025522) for 40 h at 65 °C and 20 rpm, as described  
644 previously(135, 136). Arrays were scanned at 3 µm using a high-resolution microarray scanner  
645 (Agilent, Model G2505C) and data extracted using Feature Extraction (v10.9) software. Scan data were  
646 assessed for quality by the 'Quality Metrics' report in Agilent's Feature extraction software (v10.5)  
647 (Agilent Technologies).

648

649 *SNP array genotyping*

650 SNP genotyping was performed using the Illumina CanineHD array (cat#WG-440-1001). Per  
651 manufacturer's protocol, 200ng of DNA was first denatured then neutralized with 0.1N NaOH before  
652 amplification at 37°C for 24 hours. The amplified DNA was then enzymatically fragmented and  
653 precipitated using 100% 2-propanol before drying for one hour at room temperature. After  
654 resuspension the fragmented DNA was then denatured and loaded onto the CanineHD BeadChip and  
655 hybridized for 16 hours at 48°C. BeadChips were washed, a single base extension of hybridized primers  
656 added followed by multi-layer staining of the primers. Arrays were then washed, coated with the XC4  
657 reagent (Illumina) and dried under vacuum for one hour. Coated arrays were read on the HiScan system  
658 and data visualized using the Illumina Genome Studio Genotyping 2.0 software with an average sample  
659 call rate of 97%.

660

661 *aCGH and SNP array data analysis*

662 For both aCGH and SNP arrays, copy number data were analyzed with NEXUS Copy Number v8.0  
663 software (Biodiscovery Inc., CA, USA). For cross-platform comparisons, LI-WGS BAMs were also analyzed  
664 utilizing Nexus software. CNVs were identified using a FASST2 segmentation algorithm with a  
665 significance threshold of  $5.5 \times 10^{-6}$ . Aberrations were defined as a minimum of three consecutive probes  
666 with log2 tumor: reference value of >1.14 (high gain), 1.13 to 0.2 (gain), -0.23 to -1.1 (loss), <-1.1 (big  
667 loss). Recurrent CNVs within each subtype were determined within NEXUS using an involvement  
668 threshold of 50 %. Significance of these regions was then determined in NEXUS using the GISTIC  
669 algorithm (to identify regions with a statistically high frequency of CNVs over background) with a G-  
670 score cut off of  $G > 1.0$  and a significance of  $Q < 0.05$ . CNV frequency comparisons amongst sample groups  
671 were performed in NEXUS using Fisher's exact test with differential threshold of >50 % and significance  
672  $p < 0.05$ . Significance of each probe between the two groups was calculated in NEXUS using a Mann-  
673 Whitney test for median comparison.

674

675 **Acknowledgements**

676 We thank Antonia Pritchard for valued input on genomic analyses. These studies were supported by  
677 Brooke's Blossoming Hope for Childhood Cancer Foundation, The Stand Up To Cancer – Melanoma  
678 Research Alliance/Melanoma Dream Team Translational Cancer Research Grant (SU2C-AACR-DT0612,  
679 Stand Up To Cancer is a program of the Entertainment Industry Foundation administered by the  
680 American Association for Cancer Research), Dell Inc. through the Dell Powering the Possible Program,  
681 NIH Grants UM1 CA186689 and RC2 CA148149, and philanthropic support to the TGen Foundation. CGH  
682 analysis was supported by the NC State Cancer Genomics Fund (MB).

683



684 **References**

- 685 1. Siegel R, Ma J, Zou Z, Jemal A. Cancer statistics, 2014. *CA: A Cancer Journal for Clinicians*.  
686 2014;64(1):9-29.
- 687 2. Pollock PM, Harper UL, Hansen KS, Yudt LM, Stark M, Robbins CM, et al. High frequency of BRAF  
688 mutations in nevi. *Nature genetics*. 2002;33(1):19-20.
- 689 3. Chapman PB, Hauschild A, Robert C, Haanen JB, Ascierto P, Larkin J, et al. Improved survival with  
690 vemurafenib in melanoma with BRAF V600E mutation. *New England Journal of Medicine*. 2011  
691 2011;364(26):2507-16.
- 692 4. Davies H, Bignell GR, Cox C, Stephens P, Edkins S, Clegg S, et al. Mutations of the BRAF gene in  
693 human cancer. *Nature*. 2002;417(6892):949-54.
- 694 5. Sun C, Wang L, Huang S, Heynen GJ, Prahallad A, Robert C, et al. Reversible and adaptive  
695 resistance to BRAF (V600E) inhibition in melanoma. *Nature*. 2014;508(7494):118-22.
- 696 6. Flaherty KT, Robert C, Hersey P, Nathan P, Garbe C, Milhem M, et al. Improved survival with  
697 MEK inhibition in BRAF-mutated melanoma. *New England Journal of Medicine*. 2012;367(2):107-14.
- 698 7. Flaherty KT, Infante JR, Daud A, Gonzalez R, Kefford RF, Sosman J, et al. Combined BRAF and  
699 MEK inhibition in melanoma with BRAF V600 mutations. *New England Journal of Medicine*.  
700 2012;367(18):1694-703.
- 701 8. Hodi FS, O'Day SJ, McDermott DF, Weber RW, Sosman JA, Haanen JB, et al. Improved survival  
702 with ipilimumab in patients with metastatic melanoma. *New England Journal of Medicine*.  
703 2010;363(8):711-23.
- 704 9. Thakur MD, Salangsang F, Landman AS, Sellers WR, Pryer NK, Levesque MP, et al. Modelling  
705 vemurafenib resistance in melanoma reveals a strategy to forestall drug resistance. *Nature*.  
706 2013;494(7436):251-5.
- 707 10. Khanna C, Fan TM, Gorlick R, Helman LJ, Kleinerman ES, Adamson PC, et al. Towards a Drug  
708 Development Path that Targets Metastatic Progression in Osteosarcoma. *Clinical Cancer Research*.  
709 2014;clincanres. 2574.013.
- 710 11. Paoloni M, Khanna C. Translation of new cancer treatments from pet dogs to humans. *Nature*  
711 *Reviews Cancer*. 2008 2008;8(2):147-56.
- 712 12. Tang J, Li Y, Lyon K, Camps J, Dalton S, Ried T, et al. Cancer driver-passenger distinction via  
713 sporadic human and dog cancer comparison: a proof-of-principle study with colorectal cancer.  
714 *Oncogene*. 2014;33(7):814-22.
- 715 13. Liu D, Xiong H, Ellis AE, Northrup NC, Rodriguez CO, O'Regan RM, et al. Molecular homology and  
716 difference between spontaneous canine mammary cancer and human breast cancer. *Cancer research*.  
717 2014;74(18):5045-56.
- 718 14. Bushell KR, Kim Y, Chan FC, Ben-Neriah S, Jenks A, Alcaide M, et al. Genetic inactivation of TRAF3  
719 in canine and human B-cell lymphoma. *Blood*. 2015;125(6):999-1005.
- 720 15. Schiffman JD, Breen M. Comparative oncology: what dogs and other species can teach us about  
721 humans with cancer. *Phil Trans R Soc B*. 2015;370(1673):20140231.
- 722 16. LeBlanc AK, Breen M, Choyke P, Dewhirst M, Fan TM, Gustafson DL, et al. Perspectives from  
723 man's best friend: National Academy of Medicine's Workshop on Comparative Oncology. *Sci Transl Med*.  
724 2016;8(324):324ps5.
- 725 17. Manolidis S, Donald PJ. Malignant mucosal melanoma of the head and neck. *Cancer*.  
726 1997;80(8):1373-86.
- 727 18. Meleti M, Leemans CR, de Bree R, Vescovi P, Sesenna E, van der Waal I. Head and neck mucosal  
728 melanoma: experience with 42 patients, with emphasis on the role of postoperative radiotherapy. *Head*  
729 *& Neck*. 2008;30(12):1543-51.

- 730 19. Tanaka T, Yamada R, Tanaka M, Shimizu K, Oka H, editors. A study on the image diagnosis of  
731 melanoma. Engineering in Medicine and Biology Society, 2004 IEMBS'04 26th Annual International  
732 Conference of the IEEE; 2004: IEEE.
- 733 20. Curtin JA, Busam K, Pinkel D, Bastian BC. Somatic activation of KIT in distinct subtypes of  
734 melanoma. *Journal of Clinical Oncology*. 2006;24(26):4340-6.
- 735 21. Maldonado JL, Fridlyand J, Patel H, Jain AN, Busam K, Kageshita T, et al. Determinants of BRAF  
736 mutations in primary melanomas. *Journal of the National Cancer Institute*. 2003;95(24):1878-90.
- 737 22. Curtin JA, Fridlyand J, Kageshita T, Patel HN, Busam KJ, Kutzner H, et al. Distinct sets of genetic  
738 alterations in melanoma. *New England Journal of Medicine*. 2005;353(20):2135-47.
- 739 23. Turajlic S, Furney SJ, Lambros MB, Mitsopoulos C, Kozarewa I, Geyer FC, et al. Whole genome  
740 sequencing of matched primary and metastatic acral melanomas. *Genome Res*. 2012  
741 2012/02/01/;22(2):196-207.
- 742 24. Krauthammer M, Kong Y, Ha BH, Evans P, Bacchiocchi A, McCusker JP, et al. Exome sequencing  
743 identifies recurrent somatic RAC1 mutations in melanoma. *Nature genetics*. 2012;44(9):1006-14.
- 744 25. Furney SJ, Turajlic S, Stamp G, Nohadani M, Carlisle A, Thomas JM, et al. Genome sequencing of  
745 mucosal melanomas reveals that they are driven by distinct mechanisms from cutaneous melanoma.  
746 *The Journal of Pathology*. 2013;230(3):261-9.
- 747 26. Hayward NK, Wilmott JS, Waddell N, Johansson PA, Field MA, Nones K, et al. Whole-genome  
748 landscapes of major melanoma subtypes. *Nature*. 2017;545(7653):175-80.
- 749 27. Chang AE, Karnell LH, Menck HR. The National Cancer Data Base report on cutaneous and  
750 noncutaneous melanoma. *Cancer*. 1998;83(8):1664-78.
- 751 28. Cotchin E. Melanotic tumours of dogs. *Journal of Comparative Pathology and Therapeutics*.  
752 1955;65:115-IN14.
- 753 29. Smith SH, Goldschmidt MH, McManus PM. A comparative review of melanocytic neoplasms.  
754 *Veterinary Pathology Online*. 2002 2002;39(6):651-78.
- 755 30. Villamil JA, Henry CJ, Bryan JN, Ellersieck M, Schultz L, Tyler JW, et al. Identification of the most  
756 common cutaneous neoplasms in dogs and evaluation of breed and age distributions for selected  
757 neoplasms. *Journal of the American Veterinary Medical Association*. 2011;239(7):960-5.
- 758 31. Bergman PJ. Canine Oral Melanoma. *Clinical Techniques in Small Animal Practice*. 2007  
759 2007/05//;22(2):55-60.
- 760 32. Gillard M, Cadieu E, De Brito C, Abadie J, Vergier B, Devauchelle P, et al. Naturally occurring  
761 melanomas in dogs as models for non-UV pathways of human melanomas. *Pigment Cell & Melanoma*  
762 *Research*. 2014;27(1):90-102.
- 763 33. Prasad ML, Patel SG, Huvos AG, Shah JP, Busam KJ. Primary mucosal melanoma of the head and  
764 neck. *Cancer*. 2004;100(8):1657-64.
- 765 34. Bergman PJ, Wolchok JD. Of mice and men (and dogs): development of a xenogeneic DNA  
766 vaccine for canine oral malignant melanoma. *Cancer Ther*. 2008;6:817-26.
- 767 35. Bergman P, Kent M, Farese J. Melanoma. *Withrow and MacEwen's Small Animal Clinical*  
768 *Oncology* SJ, Withrow, DM, Vail, and RL, Page, eds(St Louis, MO: Elsevier/Saunders). 2013:321-34.
- 769 36. Simpson RM, Bastian BC, Michael HT, Webster JD, Prasad ML, Conway CM, et al. Sporadic  
770 naturally occurring melanoma in dogs as a preclinical model for human melanoma. *Pigment Cell &*  
771 *Melanoma Research*. 2014;27(1):37-47.
- 772 37. Shelly S, Chien MB, Yip B, Kent MS, Theon AP, McCallan JL, et al. Exon 15 BRAF mutations are  
773 uncommon in canine oral malignant melanomas. *Mammalian Genome*. 2005;16(3):211-7.
- 774 38. Fowles JS, Denton CL, Gustafson DL. Comparative analysis of MAPK and PI3K/AKT pathway  
775 activation and inhibition in human and canine melanoma. *Veterinary and Comparative Oncology*. 2013  
776 2013:n/a-n/a.

- 777 39. Murakami A, Mori T, Sakai H, Murakami M, Yanai T, Hoshino Y, et al. Analysis of KIT expression  
778 and KIT exon 11 mutations in canine oral malignant melanomas. *Veterinary and Comparative Oncology*.  
779 2011;9(3):219-24.
- 780 40. Chu P-Y, Pan S-L, Liu C-H, Lee J, Yeh L-S, Liao AT. KIT gene exon 11 mutations in canine malignant  
781 melanoma. *The Veterinary Journal*. 2013;196(2):226-30.
- 782 41. Poorman K, Borst L, Moroff S, Roy S, Labelle P, Motsinger-Reif A, et al. Comparative cytogenetic  
783 characterization of primary canine melanocytic lesions using array CGH and fluorescence in situ  
784 hybridization. *Chromosome Res*. 2014:1-16.
- 785 42. Spring K, Lapointe L, Caron C, Langlois S, Royal I. Phosphorylation of DEP-1/PTPRJ on threonine  
786 1318 regulates Src activation and endothelial cell permeability induced by vascular endothelial growth  
787 factor. *Cellular signalling*. 2014;26(6):1283-93.
- 788 43. Liang WS, Aldrich J, Tembe W, Kurdoglu A, Cherni I, Phillips L, et al. Long insert whole genome  
789 sequencing for copy number variant and translocation detection. *Nucleic acids research*. 2014;42(2):e8-  
790 e.
- 791 44. Smedley R, Lamoureux J, Sledge D, Kiupel M. Immunohistochemical diagnosis of canine oral  
792 amelanotic melanocytic neoplasms. *Veterinary Pathology Online*. 2011;48(1):32-40.
- 793 45. Berger MF, Hodis E, Heffernan TP, Deribe YL, Lawrence MS, Protopopov A, et al. Melanoma  
794 genome sequencing reveals frequent PREX2 mutations. *Nature*. 2012;485(7399):502-6.
- 795 46. Alexandrov LB, Nik-Zainal S, Wedge DC, Aparicio SA, Behjati S, Biankin AV, et al. Signatures of  
796 mutational processes in human cancer. *Nature*. 2013.
- 797 47. Huang FW, Hodis E, Xu MJ, Kryukov GV, Chin L, Garraway LA. Highly recurrent TERT promoter  
798 mutations in human melanoma. *Science*. 2013;339(6122):957-9.
- 799 48. Nik-Zainal S, Alexandrov LB, Wedge DC, Van Loo P, Greenman CD, Raine K, et al. Mutational  
800 processes molding the genomes of 21 breast cancers. *Cell*. 2012;149(5):979-93.
- 801 49. Stark M, Hayward N. Genome-wide loss of heterozygosity and copy number analysis in  
802 melanoma using high-density single-nucleotide polymorphism arrays. *Cancer research*. 2007;67(6):2632-  
803 42.
- 804 50. Mermel CH, Schumacher SE, Hill B, Meyerson ML, Beroukhi R, Getz G. GISTIC2.0 facilitates  
805 sensitive and confident localization of the targets of focal somatic copy-number alteration in human  
806 cancers. *Genome Biol*. 2011;12(4):R41.
- 807 51. Rausch T, Zichner T, Schlattl A, Stütz AM, Benes V, Korbel JO. DELLY: structural variant discovery  
808 by integrated paired-end and split-read analysis. *Bioinformatics*. 2012;28(18):i333-i9.
- 809 52. Stephens PJ, Greenman CD, Fu B, Yang F, Bignell GR, Mudie LJ, et al. Massive genomic  
810 rearrangement acquired in a single catastrophic event during cancer development. *Cell*. 2011;144(1):27-  
811 40.
- 812 53. Kim D, Salzberg SL. TopHat-Fusion: an algorithm for discovery of novel fusion transcripts.  
813 *Genome Biol*. 2011;12(8):R72.
- 814 54. Hodis E, Watson IR, Kryukov GV, Arold ST, Imielinski M, Theurillat J-P, et al. A landscape of driver  
815 mutations in melanoma. *Cell*. 2012;150(2):251-63.
- 816 55. Furney SJ, Turajlic S, Stamp G, Nohadani M, Carlisle A, Thomas JM, et al. Genome sequencing of  
817 mucosal melanomas reveals that they are driven by distinct mechanisms from cutaneous melanoma.  
818 *The Journal of Pathology*. 2013 2013;230(3):261-9.
- 819 56. Furney SJ, Turajlic S, Stamp G, Thomas JM, Hayes A, Strauss D, et al. The mutational burden of  
820 acral melanoma revealed by whole-genome sequencing and comparative analysis. *Pigment Cell &  
821 Melanoma Research*. 2014;27(5):835-8.
- 822 57. Liang WS, Hendricks W, Kiefer J, Schmidt J, Sekar S, Carpten J, et al. Integrated genomic analyses  
823 reveal frequent TERT aberrations in acral melanoma. *Genome Res*. 2017;27(4):524-32.

- 824 58. Choi Y, Sims GE, Murphy S, Miller JR, Chan AP. Predicting the functional effect of amino acid  
825 substitutions and indels. 2012.
- 826 59. Forbes SA, Beare D, Gunasekaran P, Leung K, Bindal N, Boutselakis H, et al. COSMIC: exploring  
827 the world's knowledge of somatic mutations in human cancer. *Nucleic acids research*.  
828 2015;43(D1):D805-D11.
- 829 60. Ostman A, Yang Q, Tonks NK. Expression of DEP-1, a receptor-like protein-tyrosine-phosphatase,  
830 is enhanced with increasing cell density. *Proceedings of the National Academy of Sciences*.  
831 1994;91(21):9680-4.
- 832 61. Ruivenkamp CA, van Wezel T, Zanon C, Stassen AP, Vlcek C, Csikós T, et al. Ptpnj is a candidate  
833 for the mouse colon-cancer susceptibility locus Scc1 and is frequently deleted in human cancers. *Nature*  
834 *genetics*. 2002;31(3):295-300.
- 835 62. Ruivenkamp C, Hermsen M, Postma C, Klous A, Baak J, Meijer G, et al. LOH of PTPRJ occurs early  
836 in colorectal cancer and is associated with chromosomal loss of 18q12–21. *Oncogene*.  
837 2003;22(22):3472-4.
- 838 63. Lesueur F, Pharoah PD, Laing S, Ahmed S, Jordan C, Smith PL, et al. Allelic association of the  
839 human homologue of the mouse modifier Ptpnj with breast cancer. *Human molecular genetics*.  
840 2005;14(16):2349-56.
- 841 64. Godfrey R, Arora D, Bauer R, Stopp S, Müller JP, Heinrich T, et al. Cell transformation by FLT3 ITD  
842 in acute myeloid leukemia involves oxidative inactivation of the tumor suppressor protein-tyrosine  
843 phosphatase DEP-1/PTPRJ. *Blood*. 2012;119(19):4499-511.
- 844 65. Trapasso F, Drusco A, Costinean S, Alder H, Aqeilan RI, Iuliano R, et al. Genetic ablation of Ptpnj,  
845 a mouse cancer susceptibility gene, results in normal growth and development and does not predispose  
846 to spontaneous tumorigenesis. *DNA and cell biology*. 2006;25(6):376-82.
- 847 66. Petermann A, Haase D, Wetzel A, Balavenkatraman KK, Tenev T, Gührs KH, et al. Loss of the  
848 Protein-Tyrosine Phosphatase DEP-1/PTPRJ Drives Meningioma Cell Motility. *Brain Pathology*.  
849 2011;21(4):405-18.
- 850 67. Mita Y, Yasuda Y, Sakai A, Yamamoto H, Toyooka S, Gunduz M, et al. Missense polymorphisms of  
851 PTPRJ and PTPN13 genes affect susceptibility to a variety of human cancers. *Journal of cancer research*  
852 *and clinical oncology*. 2010;136(2):249-59.
- 853 68. Iuliano R, Palmieri D, He H, Iervolino A, Borbone E, Pallante P, et al. Role of PTPRJ genotype in  
854 papillary thyroid carcinoma risk. *Endocrine-related cancer*. 2010;17(4):1001-6.
- 855 69. Gaudio E, Costinean S, Raso C, Mangone G, Paduano F, Zanesi N, et al. Tumor suppressor activity  
856 of PTPRJ, a receptor-type protein tyrosine phosphatase, in human melanoma cells. *Cancer research*.  
857 2008;68(9 Supplement):131-.
- 858 70. Iuliano R, Le Pera I, Cristofaro C, Baudi F, Arturi F, Pallante P, et al. The tyrosine phosphatase  
859 PTPRJ/DEP-1 genotype affects thyroid carcinogenesis. *Oncogene*. 2004;23(52):8432-8.
- 860 71. Toland AE, Rozek LS, Presswala S, Rennert G, Gruber SB. PTPRJ haplotypes and colorectal cancer  
861 risk. *Cancer Epidemiology Biomarkers & Prevention*. 2008;17(10):2782-5.
- 862 72. Vogelstein B, Lane D, Levine AJ. Surfing the p53 network. *Nature*. 2000 2000;408(6810):307-10.
- 863 73. Momand J, Zambetti GP, Olson DC, George D, Levine AJ. The mdm-2 oncogene product forms a  
864 complex with the p53 protein and inhibits p53-mediated transactivation. *Cell*. 1992;69(7):1237-45.
- 865 74. Wikman H, Nymark P, Väyrynen A, Jarmalaite S, Kallioniemi A, Salmenkivi K, et al. CDK4 is a  
866 probable target gene in a novel amplicon at 12q13. 3–q14. 1 in lung cancer. *Genes, Chromosomes and*  
867 *Cancer*. 2005;42(2):193-9.
- 868 75. Reifengerger G, Ichimura K, Reifengerger J, Elkahlon AG, Meltzer PS, Collins VP. Refined  
869 mapping of 12q13–q15 amplicons in human malignant gliomas suggests CDK4/SAS and MDM2 as  
870 independent amplification targets. *Cancer research*. 1996;56(22):5141-5.

- 871 76. Vaysse A, Ratnakumar A, Derrien T, Axelsson E, Rosengren Pielberg G, Sigurdsson S, et al.  
872 Identification of Genomic Regions Associated with Phenotypic Variation between Dog Breeds using  
873 Selection Mapping. *PLoS Genet.* 2011 2011/10/13/;7(10).
- 874 77. Axelsson E, Ratnakumar A, Arendt M-L, Maqbool K, Webster MT, Perloski M, et al. The genomic  
875 signature of dog domestication reveals adaptation to a starch-rich diet. *Nature.* 2013;495(7441):360-4.
- 876 78. Lindblad-Toh K, Wade CM, Mikkelsen TS, Karlsson EK, Jaffe DB, Kamal M, et al. Genome  
877 sequence, comparative analysis and haplotype structure of the domestic dog. *Nature.* 2005  
878 2005;438(7069):803-19.
- 879 79. Bindea G, Mlecnik B, Hackl H, Charoentong P, Tosolini M, Kirilovsky A, et al. ClueGO: a Cytoscape  
880 plug-in to decipher functionally grouped gene ontology and pathway annotation networks.  
881 *Bioinformatics.* 25(8):1091-3.
- 882 80. Kanehisa M, Goto S, Sato Y, Furumichi M, Tanabe M. KEGG for integration and interpretation of  
883 large-scale molecular data sets. *Nucleic acids research.* 2011:gkr988.
- 884 81. Croft D, Mundo AF, Haw R, Milacic M, Weiser J, Wu G, et al. The Reactome pathway  
885 knowledgebase. *Nucleic acids research.* 2014;42(D1):D472-D7.
- 886 82. Elvers I, Turner-Maier J, Swofford R, Koltoukian M, Johnson J, Stewart C, et al. Exome  
887 sequencing of lymphomas from three dog breeds reveals somatic mutation patterns reflecting genetic  
888 background. *Genome Research.* 2015;25(11):1634-45.
- 889 83. Snyder A, Makarov V, Merghoub T, Yuan J, Zaretsky JM, Desrichard A, et al. Genetic basis for  
890 clinical response to CTLA-4 blockade in melanoma. *New England Journal of Medicine.*  
891 2014;371(23):2189-99.
- 892 84. Postow MA, Callahan MK, Wolchok JD. Immune checkpoint blockade in cancer therapy. *Journal*  
893 *of Clinical Oncology.* 2015;33(17):1974-82.
- 894 85. Pleasance ED, Cheetham RK, Stephens PJ, McBride DJ, Humphray SJ, Greenman CD, et al. A  
895 comprehensive catalogue of somatic mutations from a human cancer genome. *Nature.* 2010  
896 2010/01/14/;463(7278):191-6.
- 897 86. Tomasetti C, Vogelstein B, Parmigiani G. Half or more of the somatic mutations in cancers of  
898 self-renewing tissues originate prior to tumor initiation. *Proceedings of the National Academy of*  
899 *Sciences.* 2013;110(6):1999-2004.
- 900 87. Cohen D, Reif JS, Brodey RS, Keiser H. Epidemiological analysis of the most prevalent sites and  
901 types of canine neoplasia observed in a veterinary hospital. *Cancer Research.* 1974;34(11):2859-68.
- 902 88. Dorn CR, Taylor DON, Schneider R, Hibbard HH, Klauber MR. Survey of animal neoplasms in  
903 Alameda and Contra Costa Counties, California. II. Cancer morbidity in dogs and cats from Alameda  
904 County. *Journal of the National Cancer Institute.* 1968 1968;40(2):307-18.
- 905 89. Dobson JM, Samuel S, Milstein H, Rogers K, Wood JLN. Canine neoplasia in the UK: estimates of  
906 incidence rates from a population of insured dogs. *Journal of small animal practice.* 2002  
907 2002;43(6):240-6.
- 908 90. Merlo DF, Rossi L, Pellegrino C, Ceppi M, Cardellino U, Capurro C, et al. Cancer incidence in pet  
909 dogs: findings of the Animal Tumor Registry of Genoa, Italy. *J Vet Intern Med.* 2008 2008/08//Jul-  
910 undefined;22(4):976-84.
- 911 91. Albert RE, Benjamin SA, Shukla R. Life span and cancer mortality in the beagle dog and humans.  
912 *Mechanisms of ageing and development.* 1994;74(3):149-59.
- 913 92. Turker MS. Somatic cell mutations: can they provide a link between aging and cancer?  
914 *Mechanisms of ageing and development.* 2000;117(1):1-19.
- 915 93. Hirsch D, Kemmerling R, Davis S, Camps J, Meltzer PS, Ried T, et al. Chromothripsis and focal  
916 copy number alterations determine poor outcome in malignant melanoma. *Cancer Research.*  
917 2013;73(5):1454-60.

- 918 94. Rausch T, Jones DT, Zapatka M, Stütz AM, Zichner T, Weischenfeldt J, et al. Genome sequencing  
919 of pediatric medulloblastoma links catastrophic DNA rearrangements with TP53 mutations. *Cell*.  
920 2012;148(1):59-71.
- 921 95. Maher CA, Wilson RK. Chromothripsis and human disease: piecing together the shattering  
922 process. *Cell*. 2012;148(1):29-32.
- 923 96. Vassilev LT, Vu BT, Graves B, Carvajal D, Podlaski F, Filipovic Z, et al. In vivo activation of the p53  
924 pathway by small-molecule antagonists of MDM2. *Science*. 2004 2004;303(5659):844-8.
- 925 97. Network CGA. Genomic classification of cutaneous melanoma. *Cell*. 2015;161(7):1681-96.
- 926 98. Zhang T, Dutton-Regester K, Brown KM, Hayward NK. The genomic landscape of cutaneous  
927 melanoma. *Pigment Cell & Melanoma Research*. 2016.
- 928 99. Simpson RM, Bastian BC, Michael HT, Webster JD, Prasad ML, Conway CM, et al. Sporadic  
929 naturally occurring melanoma in dogs as a preclinical model for human melanoma. *Pigment Cell &*  
930 *Melanoma Research*. 2013 2013/10//:n/a-n/a.
- 931 100. Mochizuki H, Kennedy K, Shapiro SG, Breen M. BRAF Mutations in Canine Cancers. *PLOS ONE*.  
932 2015;10(6):e0129534.
- 933 101. Borges LG, Seifert RA, Grant FJ, Hart CE, Distechi CM, Edelhoff S, et al. Cloning and  
934 characterization of rat density-enhanced phosphatase-1, a protein tyrosine phosphatase expressed by  
935 vascular cells. *Circulation research*. 1996;79(3):570-80.
- 936 102. Trapasso F, Iuliano R, Boccia A, Stella A, Visconti R, Bruni P, et al. Rat protein tyrosine  
937 phosphatase  $\eta$  suppresses the neoplastic phenotype of retrovirally transformed thyroid cells through  
938 the stabilization of p27Kip1. *Molecular and cellular biology*. 2000;20(24):9236-46.
- 939 103. Keane MM, Lowrey GA, Ettenberg SA, Dayton MA, Lipkowitz S. The protein tyrosine  
940 phosphatase DEP-1 is induced during differentiation and inhibits growth of breast cancer cells. *Cancer*  
941 *research*. 1996;56(18):4236-43.
- 942 104. Balavenkatraman K, Jandt E, Friedrich K, Kautenburger T, Pool-Zobel B, Östman A, et al. DEP-1  
943 protein tyrosine phosphatase inhibits proliferation and migration of colon carcinoma cells and is  
944 upregulated by protective nutrients. *Oncogene*. 2006;25(47):6319-24.
- 945 105. Zhang L, Martelli ML, Battaglia C, Trapasso F, Tramontano D, Viglietto G, et al. Thyroid cell  
946 transformation inhibits the expression of a novel rat protein tyrosine phosphatase. *Experimental cell*  
947 *research*. 1997;235(1):62-70.
- 948 106. Trapasso F, Yendamuri S, Dumon KR, Iuliano R, Cesari R, Feig B, et al. Restoration of receptor-  
949 type protein tyrosine phosphatase  $\eta$  function inhibits human pancreatic carcinoma cell growth in vitro  
950 and in vivo. *Carcinogenesis*. 2004;25(11):2107-14.
- 951 107. Kovalenko M, Denner K, Sandström J, Persson C, Groß S, Jandt E, et al. Site-selective  
952 dephosphorylation of the platelet-derived growth factor  $\beta$ -receptor by the receptor-like protein-tyrosine  
953 phosphatase DEP-1. *Journal of Biological Chemistry*. 2000;275(21):16219-26.
- 954 108. Palka HL, Park M, Tonks NK. Hepatocyte growth factor receptor tyrosine kinase met is a  
955 substrate of the receptor protein-tyrosine phosphatase DEP-1. *Journal of Biological Chemistry*.  
956 2003;278(8):5728-35.
- 957 109. Lampugnani MG, Zanetti A, Corada M, Takahashi T, Balconi G, Breviario F, et al. Contact  
958 inhibition of VEGF-induced proliferation requires vascular endothelial cadherin,  $\beta$ -catenin, and the  
959 phosphatase DEP-1/CD148. *The Journal of cell biology*. 2003;161(4):793-804.
- 960 110. Ding L, Ellis MJ, Li S, Larson DE, Chen K, Wallis JW, et al. Genome remodelling in a basal-like  
961 breast cancer metastasis and xenograft. *Nature*. 2010;464(7291):999-1005.
- 962 111. Spring K, Fournier P, Lapointe L, Chabot C, Roussy J, Pommey S, et al. The protein tyrosine  
963 phosphatase DEP-1/PTPRJ promotes breast cancer cell invasion and metastasis. *Oncogene*. 2015.

- 964 112. Chabot C, Spring K, Gratton J-P, Elchebly M, Royal I. New role for the protein tyrosine  
965 phosphatase DEP-1 in Akt activation and endothelial cell survival. *Molecular and cellular biology*.  
966 2009;29(1):241-53.
- 967 113. Sacco F, Tinti M, Palma A, Ferrari E, Nardoza AP, van Huijsduijnen RH, et al. Tumor suppressor  
968 density-enhanced phosphatase-1 (DEP-1) inhibits the RAS pathway by direct dephosphorylation of  
969 ERK1/2 kinases. *Journal of Biological Chemistry*. 2009;284(33):22048-58.
- 970 114. Arora D, Stopp S, Böhmer S-A, Schons J, Godfrey R, Masson K, et al. Protein-tyrosine  
971 phosphatase DEP-1 controls receptor tyrosine kinase FLT3 signaling. *Journal of Biological Chemistry*.  
972 2011;286(13):10918-29.
- 973 115. Tarcic G, Boguslavsky SK, Wakim J, Kiuchi T, Liu A, Reinitz F, et al. An unbiased screen identifies  
974 DEP-1 tumor suppressor as a phosphatase controlling EGFR endocytosis. *Current Biology*.  
975 2009;19(21):1788-98.
- 976 116. Cerami E, Gao J, Dogrusoz U, Gross BE, Sumer SO, Aksoy BA, et al. The cBio cancer genomics  
977 portal: an open platform for exploring multidimensional cancer genomics data. *Cancer discovery*.  
978 2012;2(5):401-4.
- 979 117. Gao J, Aksoy BA, Dogrusoz U, Dresdner G, Gross B, Sumer SO, et al. Integrative analysis of  
980 complex cancer genomics and clinical profiles using the cBioPortal. *Science Signaling*. 2013;6(269):pl1.
- 981 118. Veeriah S, Brennan C, Meng S, Singh B, Fagin JA, Solit DB, et al. The tyrosine phosphatase PTPRD  
982 is a tumor suppressor that is frequently inactivated and mutated in glioblastoma and other human  
983 cancers. *Proceedings of the National Academy of Sciences*. 2009;106(23):9435-40.
- 984 119. Solomon DA, Kim J-S, Cronin JC, Sibenaller Z, Ryken T, Rosenberg SA, et al. Mutational  
985 inactivation of PTPRD in glioblastoma multiforme and malignant melanoma. *Cancer research*.  
986 2008;68(24):10300-6.
- 987 120. Walia V, Prickett TD, Kim JS, Gartner JJ, Lin JC, Zhou M, et al. Mutational and Functional Analysis  
988 of the Tumor-Suppressor PTPRD in Human Melanoma. *Human mutation*. 2014;35(11):1301-10.
- 989 121. Nair P, DePreter K, Vandesompele J, Speleman F, Stallings RL. Aberrant splicing of the PTPRD  
990 gene mimics microdeletions identified at this locus in neuroblastomas. *Genes, Chromosomes and  
991 Cancer*. 2008;47(3):197-202.
- 992 122. Stark MS, Woods SL, Gartside MG, Bonazzi VF, Dutton-Regester K, Aoude LG, et al. Frequent  
993 somatic mutations in MAP3K5 and MAP3K9 in metastatic melanoma identified by exome sequencing.  
994 *Nature genetics*. 2012;44(2):165-9.
- 995 123. Solimini NL, Xu Q, Mermel CH, Liang AC, Schlabach MR, Luo J, et al. Recurrent hemizygous  
996 deletions in cancers may optimize proliferative potential. *Science*. 2012;337(6090):104-9.
- 997 124. Goldschmidt MH. *Histological classification of epithelial and melanocytic tumors of the skin of  
998 domestic animals: Armed Forces Institute of Pathology: American Registry of Pathology: World Health  
999 Organization Collaborating Center for Comparative Oncology; 1998.*
- 1000 125. Liang WS, Aldrich J, Tembe W, Kurdoglu A, Cherni I, Phillips L, et al. Long insert whole genome  
1001 sequencing for copy number variant and translocation detection. *Nucleic Acids Res*. 2014 Jan;42(2):e8.
- 1002 126. Li H, Durbin R. Fast and accurate short read alignment with Burrows-Wheeler transform.  
1003 *Bioinformatics*. 2009;25(14):1754-60. doi: 10.1093/bioinformatics/btp324. Epub 2009 May 18.
- 1004 127. McKenna A, Hanna M, Banks E, Sivachenko A, Cibulskis K, Kernytsky A, et al. The Genome  
1005 Analysis Toolkit: a MapReduce framework for analyzing next-generation DNA sequencing data. *Genome  
1006 Res*. 2010;20(9):1297-303.
- 1007 128. Van der Auwera GA, Carneiro MO, Hartl C, Poplin R, del Angel G, Levy-Moonshine A, et al. From  
1008 FastQ data to high-confidence variant calls: the genome analysis toolkit best practices pipeline. *Current  
1009 protocols in bioinformatics*. 2013;11.0. 1-0. 33.

- 1010 129. Saunders CT, Wong WS, Swamy S, Becq J, Murray LJ, Cheetham RK. Strelka: accurate somatic  
1011 small-variant calling from sequenced tumor-normal sample pairs. *Bioinformatics*. 2012;28(14):1811-7.  
1012 doi: 10.093/bioinformatics/bts271. Epub 2012 May 10.
- 1013 130. Christoforides A, Carpten JD, Weiss GJ, Demeure MJ, Von Hoff DD, Craig DW. Identification of  
1014 somatic mutations in cancer through Bayesian-based analysis of sequenced genome pairs. *BMC*  
1015 *Genomics*. 2013;14:302.(doi):10.1186/471-2164-14-302.
- 1016 131. Cibulskis K, Lawrence MS, Carter SL, Sivachenko A, Jaffe D, Sougnez C, et al. Sensitive detection  
1017 of somatic point mutations in impure and heterogeneous cancer samples. *Nat Biotechnol*.  
1018 2013;31(3):213-9. doi: 10.1038/nbt.2514. Epub 013 Feb 10.
- 1019 132. Cingolani P, Platts A, Wang LL, Coon M, Nguyen T, Wang L, et al. A program for annotating and  
1020 predicting the effects of single nucleotide polymorphisms, SnpEff: SNPs in the genome of *Drosophila*  
1021 *melanogaster* strain w1118; iso-2; iso-3. *Fly*. 2012;6(2):80-92.
- 1022 133. Olshen AB, Venkatraman E, Lucito R, Wigler M. Circular binary segmentation for the analysis of  
1023 array-based DNA copy number data. *Biostatistics*. 2004;5(4):557-72.
- 1024 134. Trapnell C, Pachter L, Salzberg SL. TopHat: discovering splice junctions with RNA-Seq.  
1025 *Bioinformatics*. 2009;25(9):1105-11.
- 1026 135. Angstadt AY, Thayanithy V, Subramanian S, Modiano JF, Breen M. A genome-wide approach to  
1027 comparative oncology: high-resolution oligonucleotide aCGH of canine and human osteosarcoma  
1028 pinpoints shared microaberrations. *Cancer Genetics*. 2012 2012/11//;205(11):572-87.
- 1029 136. Thomas R, Borst L, Rotroff D, Motsinger-Reif A, Lindblad-Toh K, Modiano JF, et al. Genomic  
1030 profiling reveals extensive heterogeneity in somatic DNA copy number aberrations of canine  
1031 hemangiosarcoma. *Chromosome Res*. 2014;22(3):305-19.
- 1032
- 1033
- 1034



1035 **Tables and Figures**

**Table 1. Summary of Genomic Analyses Performed in Canine Melanoma**

| Analysis platform        | Type of alteration detected                          | Samples analyzed                                      |
|--------------------------|------------------------------------------------------|-------------------------------------------------------|
| <b>Discovery cohort</b>  |                                                      |                                                       |
| WGS                      | Point mutations, copy number, structural alterations | 7 tumor and 6 matching normal samples                 |
| LI-WGS                   | Copy number and structural alterations               |                                                       |
| mRNASeq                  | Expressed point mutations and gene fusions           |                                                       |
| aCGH                     | Copy number alterations                              |                                                       |
| SNP-A                    | Copy number alterations                              |                                                       |
| <b>Prevalence cohort</b> |                                                      |                                                       |
| Targeted Sequencing      | Point mutations                                      | 27 tumor and 11 matching normal samples, 3 cell lines |
| SNP-A                    | Copy number alterations                              |                                                       |
| Total distinct samples   |                                                      | 34 tumor samples, 18 matching normals, 3 cell lines   |

1036

**Table 2. Summary of whole-genome analysis in canine melanoma discovery cohort**

| Sample Information |            |       |        |                  | SNVs |        |          | CNVs |      |     |     | SVs |      |      |     |      |
|--------------------|------------|-------|--------|------------------|------|--------|----------|------|------|-----|-----|-----|------|------|-----|------|
| Sample             | Tumor Type | Breed | Gender | Age at Diagnosis | SNVs | Indels | Mut Rate | CNVs | CNV% | Amp | Del | SVs | CTXs | Invs | Del | Dups |
| ND09-345           | Mucosal    | ECS   | F      | 11               | 4223 | 264    | 2.03     | 41   | 0.4% | 33  | 8   | 56  | 15   | 17   | 17  | 7    |
| ND10-370           | Mucosal    | LR    | M      | 10               | 6342 | 655    | 3.14     | 64   | 2.1% | 23  | 41  | 65  | 9    | 22   | 21  | 13   |
| ND10-376           | Mucosal    | CS    | F      | 16               | 5085 | 344    | 2.48     | 4    | 0.3% | 0   | 4   | 25  | 2    | 10   | 5   | 8    |
| ND10-166           | Mucosal    | CS    | M      | 14               | 3395 | 316    | 1.23     | 68   | 0.7% | 61  | 7   | 34  | 2    | 11   | 12  | 9    |
| ND10-361           | Mucosal    | CS    | M      | 15               | 3029 | 88     | 1.42     | 5    | 0.0% | 2   | 3   | 24  | 6    | 10   | 3   | 5    |
| ND10-363           | Acral      | CS    | M      | 15               | 4906 | 323    | 2.45     | 11   | 0.2% | 2   | 9   | 9   | 0    | 2    | 5   | 2    |
| ND10-441           | Cutaneous  | CS    | F      | 11               | 1880 | 203    | 0.97     | 27   | 9.9% | 0   | 27  | 39  | 8    | 12   | 12  | 7    |

SNV = somatic single nucleotide variant; Mut Rate = Mutation Rate (SNVs + Indels / Callable Mb)

CNV = somatic copy number variant; CNV% = percentage of genome involved in CNVs; Amp = amplification-logratio >=2; Del = deletion-logratio <= -0.6

SV = somatic structural variant from LI; CTX = inter-chromosomal translocation; Inv = inversion; Del=Deletion; Dup = duplication

ECS = English cocker spaniel; LR = Labrador Retriever; CS = Cocker spaniel

1037

# SNV Types All Cases

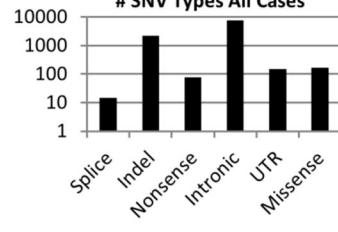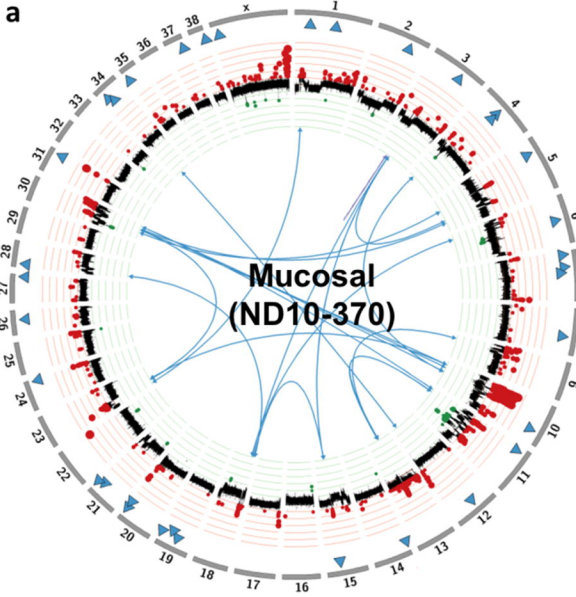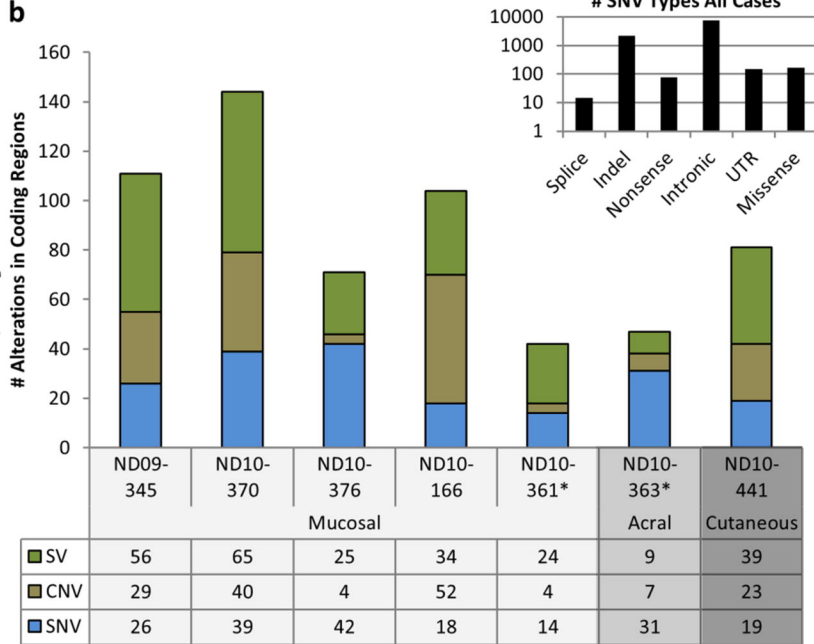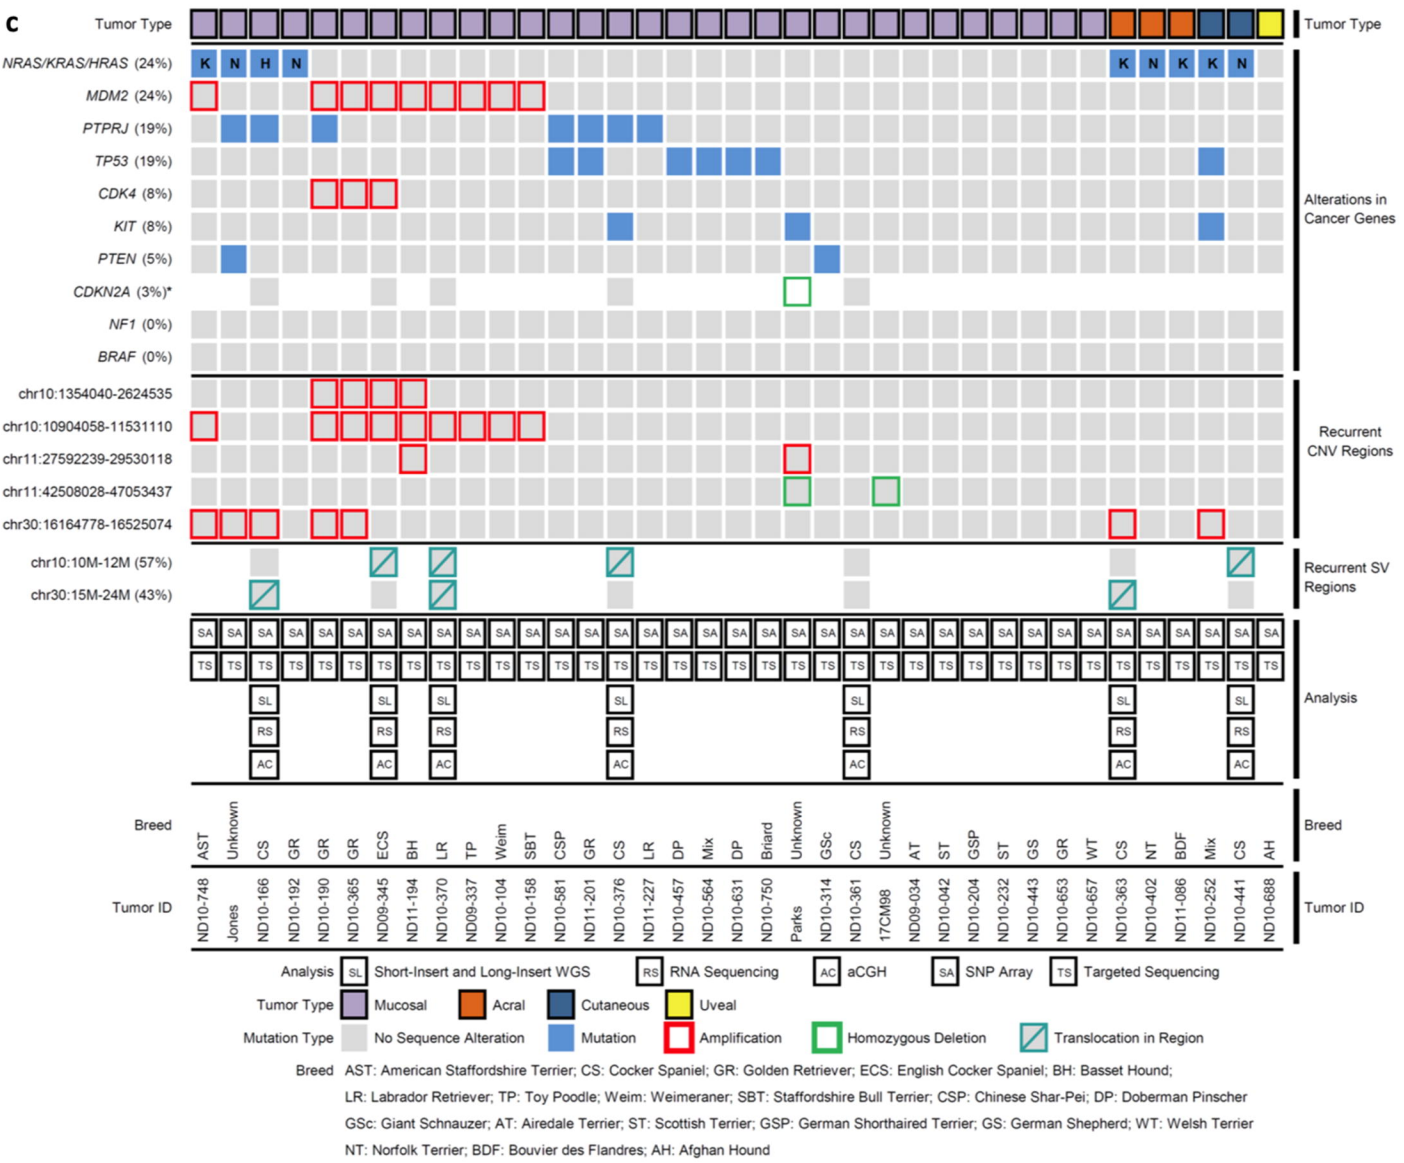

\*Sequence data not available (targeted sequencing not performed for CDKN2A locus)

**Figure 1. The mutational landscape of canine melanoma.** (a) A representative Circos plot depicting coding SNVs, CNVs, and SVs in a single mucosal melanoma. Outer circle depicts canine chromosome number. Blue triangles are SNVs located within coding regions. The middle circle denotes CNVs with gains (in red) and losses (in green) according to the aberration amplitude. Blue or red lines transecting the plot show translocations. (b) Numbers and types of coding mutations identified by SI-WGS and LI-WGS in the discovery cohort. \*ND10-361 and ND10-363 are independent primary tumors from the same dog. (c) Integrated genomic data is presented for 34 canine melanomas and 3 canine melanoma cell lines. Each column represents data from a single tumor. Indication of tumor type (mucosal, uveal, acral, and cutaneous) is displayed above annotation of recurrently-mutated and hallmark genes. Mutations identified by WGS, aCGH, SNP array, and targeted sequencing are presented in order of frequency as are recurrent CNV regions identified by SNP array and GISTIC as well as recurrent regions involved in translocations identified by LI-WGS. Genomic analysis annotation, tumor ID, and figure legend are presented at the bottom of the figure.

**a**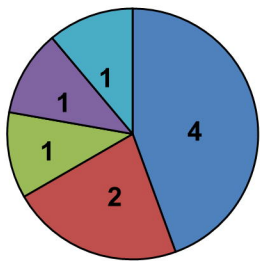

- KRAS G12C
- NRAS Q61R
- NRAS Q61H
- NRAS Q61K
- HRAS Q61R

**b**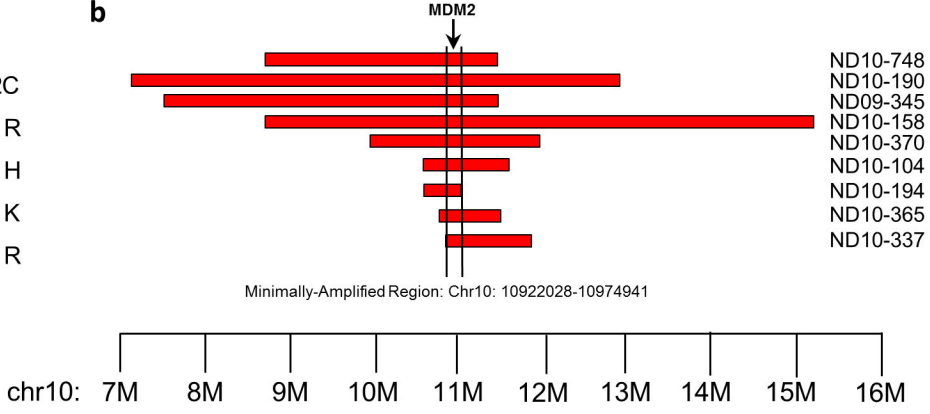**c** *PTPRJ*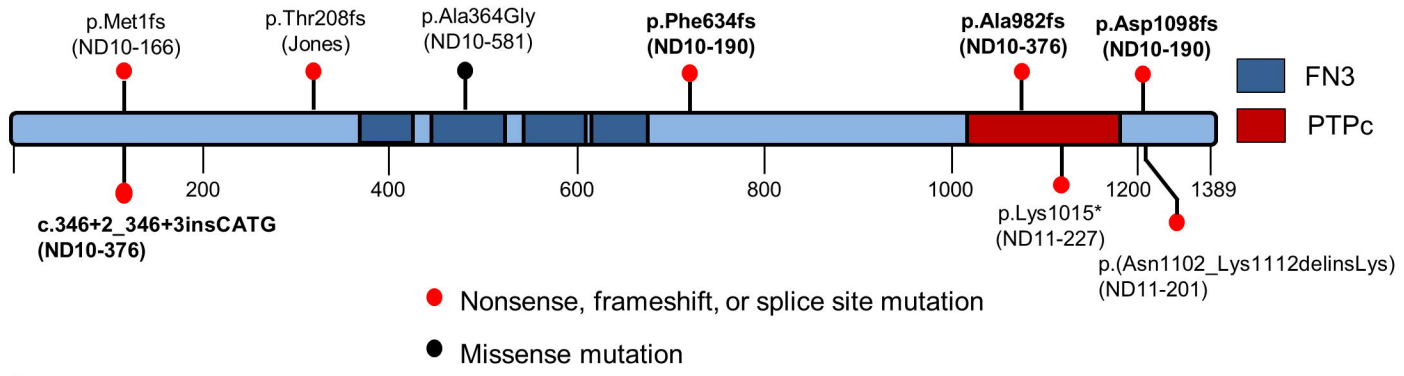**d** *TP53*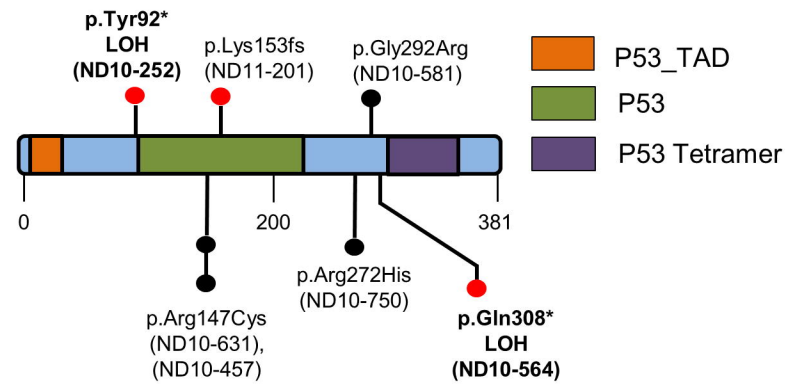

**Figure 2. Recurrent somatic alterations in canine melanoma.** (a) Distribution of *RAS* mutations within the cohort of 37 samples (n=9). (b) Recurrently amplified region on CFA 10 found in nine tumors which is defined by the minimal region surrounding *MDM2*. (c) Location of potentially deleterious mutations present in the putative tumor suppressor *PTPRJ* found through Sanger sequencing of the coding sequence for each tumor. (d) Individual mutations and their locations within *TP53*.

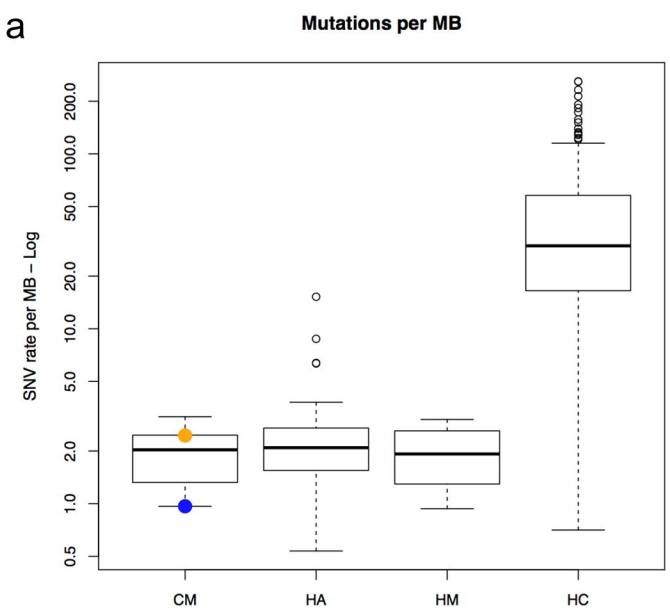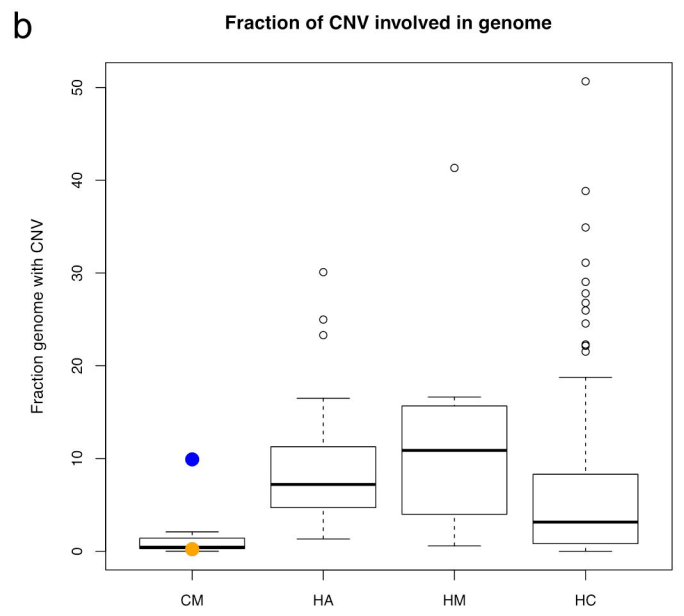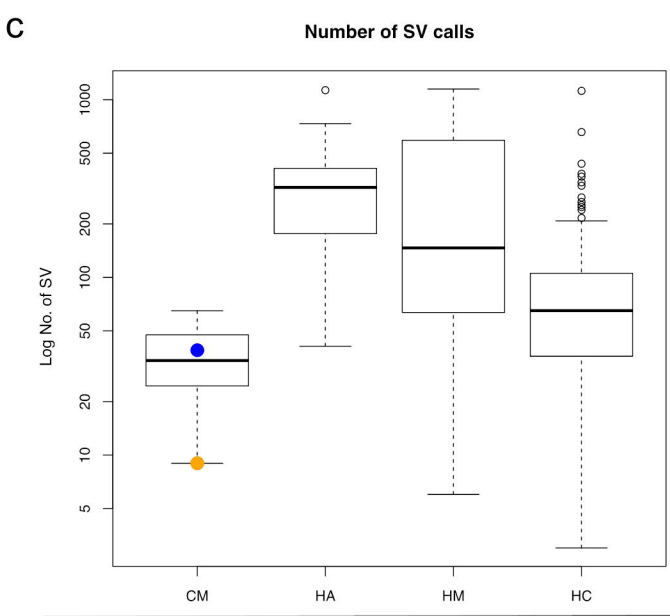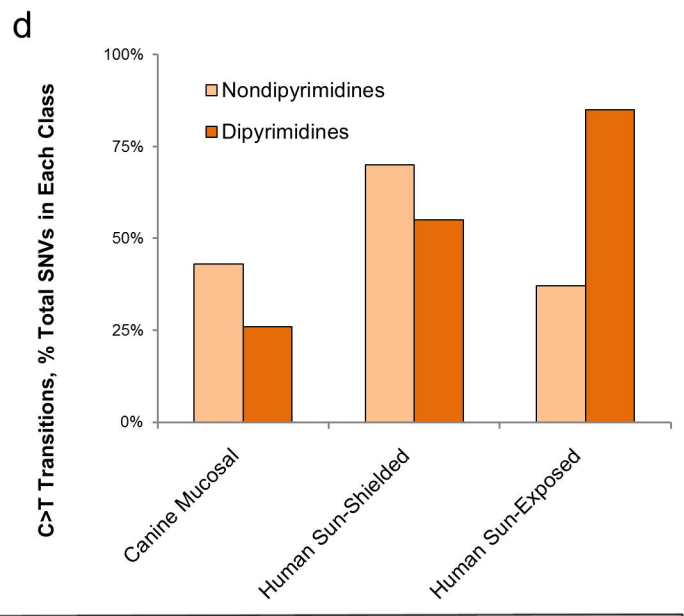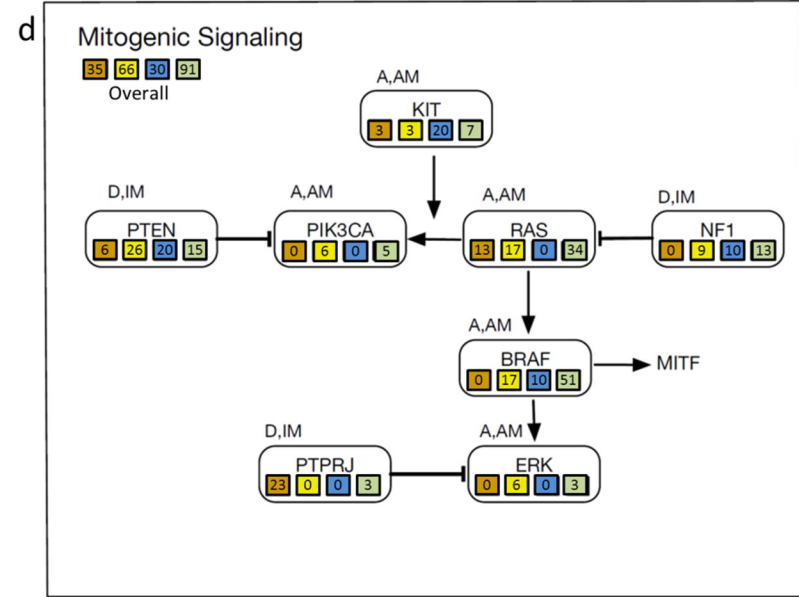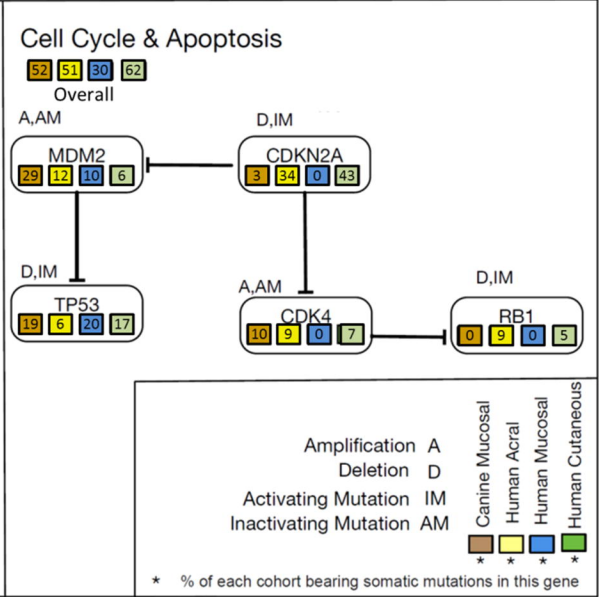

Amplification A  
Deletion D  
Activating Mutation IM  
Inactivating Mutation AM

\* Canine Mucosal  
\* Human Acral  
\* Human Mucosal  
\* Human Cutaneous

\* % of each cohort bearing somatic mutations in this gene

**Figure 3. Key dysregulated pathways in canine and human melanoma.** (a) Mutation rate in canine and human melanoma subtypes is shown as somatic SNVs per DNA Mb based on WGS in our discovery cohort compared to WGS data from 140 human cutaneous, 35 acral, and 8 mucosal melanomas (Hayward *et al.* 2017). CM: Canine Mucosal, HA: Human Acral, HM: Human Mucosal, and HC: Human Cutaneous Melanoma. Orange and blue dots in the CM plots represent the individual acral and cutaneous subtypes, respectively, in our discovery cohort. (c) Fraction of copy-number-altered genome in canine melanoma and human melanoma sequencing cohorts. (c) Total number of structural variants identified in canine and human melanoma sequencing cohorts. (d) Comparison of C>T transitions in the major melanoma types in dipyrimidine versus non-dipyrimidines. (d) Overall frequency of mutations in key melanoma pathways in our full cohort of 31 mucosal tumors compared to WGS in other subtypes from Hayward *et al.* 2017. Note that, unlike copy number data, sequence data for CDKN2A, ERK, PIK3CA, and RB1 were only available for the seven tumors in our discovery cohort .
